# Supplementary material for: Acquired resistance to bispecific antibodies by genetic or epigenetic inactivation of the target in multiple myeloma
Source: Research Square preprint supplement (doi:10.21203/rs.3.rs-2573797/v1), 2023-06-14
Supplement: Supplementary file 1 [file 32cd926b8b5d17387df7591a.xlsx]

## Sheet: Up-regulated pathways
Supplementary Table 4: Significantly enriched pathways among genes up-regulated in each MM-01-0288 subclone
Subclone	Up.Down	Database	Term	Overlap	P.value	Adjusted.P.value	Old.P.value	Old.Adjusted.P.value	Odds.Ratio	Combined.Score	Genes
cn1	UP	WikiPathways_2019_Human	VEGFA-VEGFR2 Signaling Pathway WP3888	22/236	3.84546e-09	1.13825e-06	0	0	5.13383	99.475	MAP2K4;MAP2K1;ANXA1;ROCK1;FBXW11;CLTC;STAT3;EIF2AK3;PTGS2;FOXO3;HDAC9;NFKB1;HERPUD1;ERN1;NFKBIA;PPP3CA;ITCH;RAP1A;MYO6;MAPKAPK2;RICTOR;ITGAV
cn1	UP	WikiPathways_2019_Human	TGF-beta Signaling Pathway WP366	16/132	1.30885e-08	1.9371e-06	0	0	6.81743	123.747	NUP214;MEF2A;MAP2K4;MAP2K1;CREBBP;SMURF2;ROCK1;FOS;PIAS1;ITCH;COL1A2;ZEB1;SNIP1;EP300;FOSB;ATF3
cn1	UP	WikiPathways_2019_Human	Initiation of transcription and translation elongation at the HIV-1 LTR WP3414	8/32	1.99121e-07	1.75727e-05	0	0	16.2239	250.324	NFKBIA;PPP3CA;PPP3R1;CREBBP;PPP3CC;EP300;HDAC9;NFKB1
cn1	UP	WikiPathways_2019_Human	EGF/EGFR Signaling Pathway WP437	16/162	2.37469e-07	1.75727e-05	0	0	5.40825	82.4932	MEF2A;VAV3;MAP3K2;MAP2K1;RALA;ROCK1;STAT3;PTEN;BRAF;GAB2;FOS;RPS6KA3;ITCH;RAP1A;FOSB;RICTOR
cn1	UP	WikiPathways_2019_Human	Pathways Affected in Adenoid Cystic Carcinoma WP3651	10/65	7.69486e-07	4.55536e-05	0	0	8.87955	125.002	CREBBP;NCOR1;KANSL1;KMT2C;PTEN;JMJD1C;EP300;ARID4B;FOXO3;KDM6A
cn1	UP	WikiPathways_2019_Human	IL-1 signaling pathway WP195	9/55	1.61716e-06	7.97798e-05	0	0	9.53573	127.157	MAP3K2;NFKBIA;MAP2K4;MAP2K1;MAPKAPK2;PELI2;PELI1;SQSTM1;NFKB1
cn1	UP	WikiPathways_2019_Human	Regulation of Microtubule Cytoskeleton WP2038	8/46	3.84337e-06	0.00016252	0	0	10.2393	127.676	SPRED1;CLIP1;ROCK1;MAP1B;STAT3;MAPKAPK2;PTEN;CLASP1
cn1	UP	WikiPathways_2019_Human	Brain-Derived Neurotrophic Factor (BDNF) signaling pathway WP2380	13/144	8.67244e-06	0.00032088	0	0	4.8641	56.6928	MEF2A;VAV3;MAP3K2;MAP2K1;STAT3;FOS;FOXO3;NFKB1;NFKBIA;RPS6KA3;ADAM17;RAP1A;SQSTM1
cn1	UP	WikiPathways_2019_Human	Senescence and Autophagy in Cancer WP615	11/105	1.04145e-05	0.000342521	0	0	5.71791	65.5977	MAP2K1;RB1CC1;IRF1;PTEN;CCL3;BRAF;IGF1;AMBRA1;ATG13;SQSTM1;CD44
cn1	UP	WikiPathways_2019_Human	Serotonin Receptor 4/6/7 and NR3C Signaling WP734	5/19	3.24072e-05	0.000959254	0	0	17.2628	178.448	MAP2K1;RAP1A;MAPKAPK2;BRAF;NR3C1
cn1	UP	WikiPathways_2019_Human	Hematopoietic Stem Cell Gene Regulation by GABP alpha/beta Complex WP3657	5/20	4.24851e-05	0.00112942	0	0	16.1111	162.18	CREBBP;PTEN;EP300;FOXO3;MCL1
cn1	UP	WikiPathways_2019_Human	Signaling Pathways in Glioblastoma WP2261	9/82	4.57873e-05	0.00112942	0	0	6.00051	59.9541	MAP2K4;MAP2K1;CDK6;PTEN;PLCG2;EP300;BRAF;PIK3C2A;FOXO3
cn1	UP	WikiPathways_2019_Human	Apoptosis WP254	9/84	5.54851e-05	0.00117311	0	0	5.8399	57.2275	NFKBIA;MAP2K4;IRF4;IRF1;TNFRSF10B;RIPK1;IGF1;NFKB1;MCL1
cn1	UP	WikiPathways_2019_Human	Vitamin D in inflammatory diseases WP4482	5/22	6.97641e-05	0.00137668	0	0	14.2142	136.036	NFKBIA;PPP3CA;PPP3R1;NR3C1;NFKB1
cn1	UP	WikiPathways_2019_Human	Estrogen signaling pathway WP712	5/23	8.76503e-05	0.00162153	0	0	13.4239	125.408	MAP2K1;GNB1;BRAF;FOS;NFKB1
cn1	UP	WikiPathways_2019_Human	Corticotropin-releasing hormone signaling pathway WP2355	9/93	0.000123308	0.00206541	0	0	5.21179	46.9104	ERN1;NFKBIA;MAP2K1;GNB1;PLCG2;FOSB;BRAF;FOS;NFKB1
cn1	UP	WikiPathways_2019_Human	Cardiac Hypertrophic Response WP2795	7/55	0.0001256	0.00206541	0	0	7.07165	63.5205	MEF2A;PPP3CA;MAP2K4;MAP2K1;IGF1;HDAC9;NFKB1
cn1	UP	WikiPathways_2019_Human	Regulation of toll-like receptor signaling pathway WP1449	11/139	0.000140408	0.0021874	0	0	4.19177	37.185	NFKBIA;MAP2K4;MAP2K1;RNF216;PELI2;PELI1;CCL3;RIPK1;FOS;SQSTM1;NFKB1
cn1	UP	WikiPathways_2019_Human	B Cell Receptor Signaling Pathway WP23	9/97	0.000170519	0.00252368	0	0	4.97387	43.1566	NFKBIA;MAP2K1;IRF4;PLCG2;BRAF;GAB2;NFKB1;MALT1;RASGRP3
cn1	UP	WikiPathways_2019_Human	Kit receptor signaling pathway WP304	7/59	0.000196829	0.00277435	0	0	6.52634	55.6904	RPS6KA3;MAP2K1;STAT3;EP300;GAB2;FOS;FOXO3
cn1	UP	WikiPathways_2019_Human	Notch Signaling Pathway WP61	7/61	0.000243032	0.00326988	0	0	6.28398	52.2973	ADAM17;ITCH;NCOR1;STAT3;EP300;HIF1A;NFKB1
cn1	UP	WikiPathways_2019_Human	Circadian rhythm related genes WP3594	13/201	0.000272679	0.0034346	0	0	3.37941	27.7356	DDX5;FBXW11;GFPT1;DYRK1A;PTEN;PASD1;UBE3A;NCOR1;NAMPT;CRY1;EP300;TOP1;OGT
cn1	UP	WikiPathways_2019_Human	T-Cell Receptor and Co-stimulatory Signaling WP2583	5/29	0.00027958	0.0034346	0	0	10.0648	82.3526	NFKBIA;PPP3CA;PTEN;DYRK1A;NFKB1
cn1	UP	WikiPathways_2019_Human	Integrated Breast Cancer Pathway WP1984	11/151	0.000290085	0.0034346	0	0	3.83011	31.1975	RALA;RAP1A;ANXA1;GADD45A;PTEN;EP300;BRAF;NFKB1;PIAS1;RASGRP3;ATR
cn1	UP	WikiPathways_2019_Human	MicroRNAs in cardiomyocyte hypertrophy WP1544	8/84	0.000326186	0.00361665	0	0	5.10971	41.021	PPP3CA;MAP2K4;MAP2K1;ROCK1;STAT3;IGF1;HDAC9;NFKB1
cn1	UP	WikiPathways_2019_Human	PI3K-AKT-mTOR signaling pathway and therapeutic opportunities WP3844	5/30	0.000329897	0.00361665	0	0	9.66173	77.4555	RB1CC1;PTEN;RICTOR;FOXO3;ATG13
cn1	UP	WikiPathways_2019_Human	Oncostatin M Signaling Pathway WP2374	7/65	0.000361565	0.00379492	0	0	5.84941	46.3569	NFKBIA;MAP2K1;STAT3;RICTOR;FOS;HIF1A;NFKB1
cn1	UP	WikiPathways_2019_Human	Energy Metabolism WP1541	6/47	0.00037742	0.00379492	0	0	7.08126	55.8156	MEF2A;PPP3CA;PPP3R1;PPP3CC;EP300;FOXO3
cn1	UP	WikiPathways_2019_Human	Human Thyroid Stimulating Hormone (TSH) signaling pathway WP2032	7/66	0.000397441	0.00379492	0	0	5.74997	45.0249	GNA13;MAP2K1;RAP1A;STAT3;GNB1;BRAF;FOS
cn1	UP	WikiPathways_2019_Human	Non-small cell lung cancer WP4255	7/66	0.000397441	0.00379492	0	0	5.74997	45.0249	MAP2K1;CDK6;GADD45A;STAT3;PLCG2;BRAF;FOXO3
cn1	UP	WikiPathways_2019_Human	Structural Pathway of Interleukin 1 (IL-1) WP2637	6/49	0.000474889	0.00417921	0	0	6.75121	51.6631	NFKBIA;MAP2K4;MAP2K1;MAPKAPK2;FOS;NFKB1
cn1	UP	WikiPathways_2019_Human	Androgen receptor signaling pathway WP138	8/90	0.00052145	0.00417921	0	0	4.73438	35.7867	CREBBP;NCOR1;ROCK1;STAT3;PTEN;EP300;UBE3A;PIAS1
cn1	UP	WikiPathways_2019_Human	T-Cell antigen Receptor (TCR) Signaling Pathway WP69	8/90	0.00052145	0.00417921	0	0	4.73438	35.7867	VAV3;NFKBIA;MAP2K1;IRF4;GAB2;FOS;MALT1;NFKB1
cn1	UP	WikiPathways_2019_Human	Prion disease pathway WP3995	5/33	0.000522402	0.00417921	0	0	8.62522	65.1814	IRF4;STAT3;EP300;CHD2;NFKB1
cn1	UP	WikiPathways_2019_Human	miRNA regulation of prostate cancer signaling pathways WP3981	5/33	0.000522402	0.00417921	0	0	8.62522	65.1814	NFKBIA;CREBBP;MAP2K1;PLCL2;NFKB1
cn1	UP	WikiPathways_2019_Human	Chemokine signaling pathway WP3929	11/164	0.000585695	0.0044568	0	0	3.50233	26.0669	NFKBIA;VAV3;MAP2K1;RAP1A;ROCK1;GNB1;STAT3;CCL3;BRAF;FOXO3;NFKB1
cn1	UP	WikiPathways_2019_Human	MAPK Signaling Pathway WP382	14/246	0.00058793	0.0044568	0	0	2.94989	21.9439	MAP3K2;MAP2K4;MAP2K1;GADD45A;BRAF;FOS;NFKB1;RASGRP3;RPS6KA3;PPP3CA;PPP3R1;PPP3CC;RAP1A;MAPKAPK2
cn1	UP	WikiPathways_2019_Human	Signaling of Hepatocyte Growth Factor Receptor WP313	5/34	0.00060227	0.0044568	0	0	8.32737	61.7458	MAP2K1;RAP1A;STAT3;PTEN;FOS
cn1	UP	WikiPathways_2019_Human	Apoptosis-related network due to altered Notch3 in ovarian cancer WP2864	6/53	0.000727816	0.00512937	0	0	6.17537	44.6199	VAV3;ERN1;ANXA5;TNFRSF10B;SQSTM1;NFKB1
cn1	UP	WikiPathways_2019_Human	IL-4 Signaling Pathway WP395	6/54	0.000804849	0.00554036	0	0	6.04641	43.0798	NFKBIA;STAT3;EP300;GAB2;FOS;NFKB1
cn1	UP	WikiPathways_2019_Human	Focal Adhesion WP306	12/198	0.000826456	0.0055598	0	0	3.1454	22.3272	VAV3;MAP2K1;COL1A2;RAP1A;PPP1R12A;ROCK1;PTEN;BRAF;ITGAV;ITGB7;IGF1;ARHGAP5
cn1	UP	WikiPathways_2019_Human	RANKL/RANK (Receptor activator of NFKB (ligand)) Signaling Pathway WP2018	6/55	0.000888023	0.00584122	0	0	5.92271	41.616	NFKBIA;MAP2K1;GAB2;FOS;SQSTM1;NFKB1
cn1	UP	WikiPathways_2019_Human	Prolactin Signaling Pathway WP2037	7/76	0.000936717	0.00602757	0	0	4.91412	34.2668	NFKBIA;MAP2K1;IRF1;STAT3;GAB2;FOS;NFKB1
cn1	UP	WikiPathways_2019_Human	PDGF Pathway WP2526	5/39	0.00114597	0.00721035	0	0	7.10094	48.0841	NFKBIA;MAP2K4;MAP2K1;STAT3;FOS
cn1	UP	WikiPathways_2019_Human	mRNA Processing WP411	9/126	0.00116925	0.00721035	0	0	3.73547	25.2196	SRPK2;RNGTT;HNRNPH1;CELF2;HNRNPA2B1;SRSF4;SREK1;SF3B1;PTBP2
cn1	UP	WikiPathways_2019_Human	IL-5 Signaling Pathway WP127	5/40	0.00128793	0.00778015	0	0	6.89771	45.9023	SPRED1;MAP2K1;STAT3;FOS;FOXO3
cn1	UP	WikiPathways_2019_Human	Alzheimers Disease WP2059	7/83	0.00157457	0.00932144	0	0	4.45991	28.7832	ERN1;VMP1;PPP3CA;ADAM17;PPP3R1;PPP3CC;EIF2AK3
cn1	UP	WikiPathways_2019_Human	IL-2 Signaling Pathway WP49	5/42	0.00161024	0.00934568	0	0	6.52419	41.9595	MAP2K1;STAT3;GAB2;FOS;FOXO3
cn1	UP	WikiPathways_2019_Human	Ciliary landscape WP4352	12/216	0.00174179	0.00976615	0	0	2.86521	18.2022	RAB2A;MKLN1;CREBBP;DDX5;PSMD12;UBE2H;WDR26;RNGTT;ARMC8;ARFGAP3;NFKB1;ARL8B
cn1	UP	WikiPathways_2019_Human	IL-6 signaling pathway WP364	5/43	0.0017919	0.00976615	0	0	6.35218	40.1742	MAP2K4;CREBBP;MAP2K1;IRF1;STAT3
cn1	UP	WikiPathways_2019_Human	Pathways in clear cell renal cell carcinoma WP4018	7/85	0.0018078	0.00976615	0	0	4.3451	27.4421	CREBBP;ZEB1;STAT3;PTEN;EP300;SQSTM1;HIF1A
cn1	UP	WikiPathways_2019_Human	Endometrial cancer WP4155	6/63	0.00181466	0.00976615	0	0	5.08937	32.1234	MAP2K1;GADD45A;PTEN;BRAF;FOS;FOXO3
cn1	UP	WikiPathways_2019_Human	AGE/RAGE pathway WP2324	6/66	0.00230526	0.0115654	0	0	4.83416	29.3557	NFKBIA;MAP2K1;ROCK1;STAT3;HIF1A;NFKB1
cn1	UP	WikiPathways_2019_Human	Pancreatic adenocarcinoma pathway WP4263	7/89	0.00235402	0.0116132	0	0	4.1323	25.0072	MAP2K1;RALA;CDK6;GADD45A;STAT3;BRAF;NFKB1
cn1	UP	WikiPathways_2019_Human	Apoptosis Modulation and Signaling WP1772	7/91	0.00267082	0.0127404	0	0	4.0335	23.9	NFKBIA;TNFRSF10B;BIRC6;RIPK1;FOS;NFKB1;MCL1
cn1	UP	WikiPathways_2019_Human	Thymic Stromal LymphoPoietin (TSLP) Signaling Pathway WP2203	5/47	0.00267101	0.0127404	0	0	5.74603	34.047	NFKBIA;MAP2K1;STAT3;GAB2;NFKB1
cn1	UP	WikiPathways_2019_Human	Spinal Cord Injury WP2431	8/118	0.00300189	0.0135414	0	0	3.5242	20.4704	PPP3CA;ANXA1;CHST11;GADD45A;FOS;FOXO3;PTGS2;RTN4
cn1	UP	WikiPathways_2019_Human	G Protein Signaling Pathways WP35	7/93	0.00301936	0.0135414	0	0	3.93929	22.8586	GNA13;PPP3CA;AKAP13;PPP3CC;AKAP9;GNB1;PDE4B
cn1	UP	WikiPathways_2019_Human	Hepatitis C and Hepatocellular Carcinoma WP3646	5/49	0.00321154	0.0141883	0	0	5.48429	31.4853	STAT3;PTGS2;HIF1A;CD44;NFKB1
cn1	UP	WikiPathways_2019_Human	Cell Cycle WP179	8/120	0.00332898	0.0144909	0	0	3.46091	19.7448	STAG1;CDK6;TFDP2;GADD45A;CDC27;EP300;CDC14A;ATR
cn1	UP	WikiPathways_2019_Human	Chromosomal and microsatellite instability in colorectal cancer WP4216	6/73	0.00383277	0.016442	0	0	4.32755	24.0792	MAP2K1;RALA;GADD45A;BRAF;FOS;PTGS2
cn1	UP	WikiPathways_2019_Human	Focal Adhesion-PI3K-Akt-mTOR-signaling pathway WP3932	14/303	0.00411229	0.0173891	0	0	2.3611	12.9714	RAB2A;MAP2K1;CAB39;PTEN;IGF1;FOXO3;PIK3C2A;HIF1A;COL1A2;PPP2R5E;CREB3L2;GNB1;ITGAV;ITGB7
cn1	UP	WikiPathways_2019_Human	Breast cancer pathway WP4262	9/154	0.00456614	0.0190363	0	0	3.0098	16.2201	MAP2K1;CDK6;GADD45A;FZD6;PTEN;BRAF;IGF1;FOS;ATR
cn1	UP	WikiPathways_2019_Human	Leptin signaling pathway WP2034	6/76	0.00467712	0.0192281	0	0	4.14144	22.2191	MAP2K1;ROCK1;STAT3;PTEN;PLCG2;NFKB1
cn1	UP	WikiPathways_2019_Human	Integrin-mediated Cell Adhesion WP185	7/101	0.00477192	0.0193491	0	0	3.60256	19.2557	VAV3;MAP2K1;RAP1A;ROCK1;BRAF;ITGAV;ITGB7
cn1	UP	WikiPathways_2019_Human	TGF-beta Receptor Signaling WP560	5/54	0.00490113	0.0196045	0	0	4.92341	26.1841	CREBBP;STAT3;EP300;FOS;NFKB1
cn1	UP	WikiPathways_2019_Human	Ebola Virus Pathway on Host WP4217	8/129	0.00515636	0.0203505	0	0	3.20201	16.8666	ADAM17;CREBBP;CLTC;EP300;ITGAV;TOP1;NFKB1;RAB7A
cn1	UP	WikiPathways_2019_Human	Toll-like Receptor Signaling Pathway WP75	7/103	0.00531014	0.0206816	0	0	3.52714	18.4756	NFKBIA;MAP2K4;MAP2K1;CCL3;RIPK1;FOS;NFKB1
cn1	UP	WikiPathways_2019_Human	Adipogenesis WP236	8/130	0.00539903	0.0207547	0	0	3.1756	16.5815	MEF2A;NCOR1;GADD45A;NAMPT;STAT3;IGF1;NR3C1;HIF1A
cn1	UP	WikiPathways_2019_Human	Insulin Signaling WP481	9/160	0.0058445	0.0218685	0	0	2.88932	14.8576	MAP3K2;RPS6KA3;MAP2K4;RPS6KA6;MAP2K1;PTEN;FOS;FOXO3;PIK3C2A
cn1	UP	WikiPathways_2019_Human	Angiopoietin Like Protein 8 Regulatory Pathway WP3915	8/132	0.00591042	0.0218685	0	0	3.12406	16.0297	MAP3K2;RPS6KA3;MAP2K4;RPS6KA6;MAP2K1;RICTOR;FOXO3;PIK3C2A
cn1	UP	WikiPathways_2019_Human	T-Cell antigen Receptor (TCR) pathway during Staphylococcus aureus infection WP3863	5/62	0.00878306	0.0309498	0	0	4.23067	20.0319	NFKBIA;MAP2K1;FOS;MALT1;NFKB1
cn1	UP	WikiPathways_2019_Human	Hair Follicle Development: Cytodifferentiation (Part 3 of 3) WP2840	6/87	0.00896332	0.0312135	0	0	3.57701	16.8642	ADAM17;FOSB;FOS;IGF1;NR3C1;NFKB1
cn1	UP	WikiPathways_2019_Human	TNF alpha Signaling Pathway WP231	6/92	0.0116304	0.038681	0	0	3.36818	15.0023	NFKBIA;MAP2K4;CREBBP;FBXW11;RIPK1;NFKB1
cn1	UP	WikiPathways_2019_Human	DNA Damage Response WP707	5/68	0.0128143	0.0421448	0	0	3.82657	16.6731	CDK6;GADD45A;TLK2;TNFRSF10B;ATR
cn1	UP	WikiPathways_2019_Human	Ras Signaling WP4223	9/184	0.0138788	0.0441733	0	0	2.48999	10.6507	MAP2K1;RALA;RAP1A;GNB1;PLCG2;GAB2;RGL1;NFKB1;RASGRP3
cn1	UP	WikiPathways_2019_Human	miRNA Regulation of DNA Damage Response WP1530	5/71	0.0152339	0.0469711	0	0	3.65208	15.2811	CDK6;GADD45A;TLK2;TNFRSF10B;ATR
cn5	UP	KEGG_2021_Human	Ribosome	45/158	4.96048e-62	7.04388e-60	0	0	85.4896	12067.6	RPL3;RPL32;RPL10;RPLP1;RPLP0;RPL11;RPL36A;RPL10A;RPL8;RPL7;RPS15;RPS4X;RPS14;RPL7A;RPS17;RPS16;RPL18A;RPS19;RPS18;RPS3;RPLP2;RPL13;RPL15;RPS11;RPL18;RPS27A;RPS13;RPS12;RPL19;RPS8;RPL23;RPS5;RPS6;RPL13A;RPSA;RPS3A;RPL23A;RPS28;RPL27A;RPL37A;RPL24;RPL29;RPL28;RPS24;RPS23
cn5	UP	KEGG_2021_Human	Coronavirus disease	46/232	2.35308e-55	1.67068e-53	0	0	53.4764	6726.61	RPL3;RPL32;RPL10;RPLP1;RPLP0;RPL11;RPL36A;RPL10A;RPL8;RPL7;RPS15;RPS4X;RPS14;RPL7A;RPS17;RPS16;RPL18A;RPS19;RPS18;RPS3;RPLP2;RPL13;RPL15;RPS11;RPL18;RPS27A;RPS13;RPS12;RPL19;PRKCB;RPS8;RPL23;RPS5;RPS6;RPL13A;RPSA;RPS3A;RPL23A;RPS28;RPL27A;RPL37A;RPL24;RPL29;RPL28;RPS24;RPS23
cn5	UP	Reactome_2022	Eukaryotic Translation Elongation R-HSA-156842	43/90	4.14429e-71	2.16332e-68	0	0	192.867	31256.4	RPL3;RPL32;RPLP1;RPLP0;RPL11;RPL36A;RPL10A;RPL8;RPL7;EEF1B2;RPS15;RPS4X;RPL7A;RPS14;RPS17;RPS16;RPL18A;RPS19;RPS3;RPLP2;RPL15;RPS11;RPL18;RPS27A;RPS13;RPS12;RPL19;RPS8;RPL23;RPS5;RPS6;RPL13A;RPS3A;RPSA;RPL23A;EEF1G;RPS28;RPL27A;RPL37A;RPL29;RPL28;RPS24;RPS23
cn5	UP	Reactome_2022	Peptide Chain Elongation R-HSA-156902	41/86	1.15977e-67	3.02701e-65	0	0	188.088	28989	RPL3;RPL32;RPLP1;RPLP0;RPL11;RPL36A;RPL10A;RPL8;RPL7;RPS15;RPS4X;RPL7A;RPS14;RPS17;RPS16;RPL18A;RPS19;RPS3;RPLP2;RPL15;RPS11;RPL18;RPS27A;RPS13;RPS12;RPL19;RPS8;RPL23;RPS5;RPS6;RPL13A;RPS3A;RPSA;RPL23A;RPS28;RPL27A;RPL37A;RPL29;RPL28;RPS24;RPS23
cn5	UP	Reactome_2022	Selenocysteine Synthesis R-HSA-2408557	41/90	1.37302e-66	1.43343e-64	0	0	172.699	26190.4	RPL3;RPL32;RPLP1;RPLP0;RPL11;RPL36A;RPL10A;RPL8;RPL7;RPS15;RPS4X;RPL7A;RPS14;RPS17;RPS16;RPL18A;RPS19;RPS3;RPLP2;RPL15;RPS11;RPL18;RPS27A;RPS13;RPS12;RPL19;RPS8;RPL23;RPS5;RPS6;RPL13A;RPS3A;RPSA;RPL23A;RPS28;RPL27A;RPL37A;RPL29;RPL28;RPS24;RPS23
cn5	UP	Reactome_2022	Eukaryotic Translation Termination R-HSA-72764	41/90	1.37302e-66	1.43343e-64	0	0	172.699	26190.4	RPL3;RPL32;RPLP1;RPLP0;RPL11;RPL36A;RPL10A;RPL8;RPL7;RPS15;RPS4X;RPL7A;RPS14;RPS17;RPS16;RPL18A;RPS19;RPS3;RPLP2;RPL15;RPS11;RPL18;RPS27A;RPS13;RPS12;RPL19;RPS8;RPL23;RPS5;RPS6;RPL13A;RPS3A;RPSA;RPL23A;RPS28;RPL27A;RPL37A;RPL29;RPL28;RPS24;RPS23
cn5	UP	Reactome_2022	Viral mRNA Translation R-HSA-192823	41/90	1.37302e-66	1.43343e-64	0	0	172.699	26190.4	RPL3;RPL32;RPLP1;RPLP0;RPL11;RPL36A;RPL10A;RPL8;RPL7;RPS15;RPS4X;RPL7A;RPS14;RPS17;RPS16;RPL18A;RPS19;RPS3;RPLP2;RPL15;RPS11;RPL18;RPS27A;RPS13;RPS12;RPL19;RPS8;RPL23;RPS5;RPS6;RPL13A;RPS3A;RPSA;RPL23A;RPS28;RPL27A;RPL37A;RPL29;RPL28;RPS24;RPS23
cn5	UP	Reactome_2022	Nonsense Mediated Decay (NMD) Independent Of Exon Junction Complex (EJC) R-HSA-975956	41/92	4.46625e-66	3.88563e-64	0	0	165.909	24965	RPL3;RPL32;RPLP1;RPLP0;RPL11;RPL36A;RPL10A;RPL8;RPL7;RPS15;RPS4X;RPL7A;RPS14;RPS17;RPS16;RPL18A;RPS19;RPS3;RPLP2;RPL15;RPS11;RPL18;RPS27A;RPS13;RPS12;RPL19;RPS8;RPL23;RPS5;RPS6;RPL13A;RPS3A;RPSA;RPL23A;RPS28;RPL27A;RPL37A;RPL29;RPL28;RPS24;RPS23
cn5	UP	Reactome_2022	Response Of EIF2AK4 (GCN2) To Amino Acid Deficiency R-HSA-9633012	41/98	1.25997e-64	8.22128e-63	0	0	148.4	21834.8	RPL3;RPL32;RPLP1;RPLP0;RPL11;RPL36A;RPL10A;RPL8;RPL7;RPS15;RPS4X;RPS14;RPL7A;RPS17;RPS16;RPL18A;RPS19;RPS3;RPLP2;RPL15;RPS11;RPL18;RPS27A;RPS13;RPS12;RPL19;RPS8;RPL23;RPS5;RPS6;RPL13A;RPSA;RPS3A;RPL23A;RPS28;RPL27A;RPL37A;RPL29;RPL28;RPS24;RPS23
cn5	UP	Reactome_2022	Formation Of A Pool Of Free 40S Subunits R-HSA-72689	41/98	1.25997e-64	8.22128e-63	0	0	148.4	21834.8	RPL3;RPL32;RPLP1;RPLP0;RPL11;RPL36A;RPL10A;RPL8;RPL7;RPS15;RPS4X;RPS14;RPL7A;RPS17;RPS16;RPL18A;RPS19;RPS3;RPLP2;RPL15;RPS11;RPL18;RPS27A;RPS13;RPS12;RPL19;RPS8;RPL23;RPS5;RPS6;RPL13A;RPSA;RPS3A;RPL23A;RPS28;RPL27A;RPL37A;RPL29;RPL28;RPS24;RPS23
cn5	UP	Reactome_2022	SRP-dependent Cotranslational Protein Targeting To Membrane R-HSA-1799339	42/108	1.45121e-64	8.417e-63	0	0	132.611	19493	RPL3;RPL32;RPLP1;RPLP0;RPL11;RPL36A;RPL10A;RPL8;RPL7;RPS15;RPS4X;RPS14;RPL7A;RPS17;RPS16;RPL18A;RPS19;RPS3;RPLP2;RPL15;RPS11;RPL18;RPS27A;RPS13;RPS12;RPL19;SSR4;RPS8;RPL23;RPS5;RPS6;RPL13A;RPSA;RPS3A;RPL23A;RPS28;RPL27A;RPL37A;RPL29;RPL28;RPS24;RPS23
cn5	UP	Reactome_2022	L13a-mediated Translational Silencing Of Ceruloplasmin Expression R-HSA-156827	41/108	1.87795e-62	9.80292e-61	0	0	126.187	17935	RPL3;RPL32;RPLP1;RPLP0;RPL11;RPL36A;RPL10A;RPL8;RPL7;RPS15;RPS4X;RPS14;RPL7A;RPS17;RPS16;RPL18A;RPS19;RPS3;RPLP2;RPL15;RPS11;RPL18;RPS27A;RPS13;RPS12;RPL19;RPS8;RPL23;RPS5;RPS6;RPL13A;RPSA;RPS3A;RPL23A;RPS28;RPL27A;RPL37A;RPL29;RPL28;RPS24;RPS23
cn5	UP	Reactome_2022	GTP Hydrolysis And Joining Of 60S Ribosomal Subunit R-HSA-72706	41/109	2.99626e-62	1.42186e-60	0	0	124.325	17612.3	RPL3;RPL32;RPLP1;RPLP0;RPL11;RPL36A;RPL10A;RPL8;RPL7;RPS15;RPS4X;RPS14;RPL7A;RPS17;RPS16;RPL18A;RPS19;RPS3;RPLP2;RPL15;RPS11;RPL18;RPS27A;RPS13;RPS12;RPL19;RPS8;RPL23;RPS5;RPS6;RPL13A;RPSA;RPS3A;RPL23A;RPS28;RPL27A;RPL37A;RPL29;RPL28;RPS24;RPS23
cn5	UP	Reactome_2022	Nonsense Mediated Decay (NMD) Enhanced By Exon Junction Complex (EJC) R-HSA-975957	41/112	1.17825e-61	5.12537e-60	0	0	119.054	16702.5	RPL3;RPL32;RPLP1;RPLP0;RPL11;RPL36A;RPL10A;RPL8;RPL7;RPS15;RPS4X;RPS14;RPL7A;RPS17;RPS16;RPL18A;RPS19;RPS3;RPLP2;RPL15;RPS11;RPL18;RPS27A;RPS13;RPS12;RPL19;RPS8;RPL23;RPS5;RPS6;RPL13A;RPSA;RPS3A;RPL23A;RPS28;RPL27A;RPL37A;RPL29;RPL28;RPS24;RPS23
cn5	UP	Reactome_2022	Selenoamino Acid Metabolism R-HSA-2408522	41/114	2.86097e-61	1.14879e-59	0	0	115.781	16140.6	RPL3;RPL32;RPLP1;RPLP0;RPL11;RPL36A;RPL10A;RPL8;RPL7;RPS15;RPS4X;RPS14;RPL7A;RPS17;RPS16;RPL18A;RPS19;RPS3;RPLP2;RPL15;RPS11;RPL18;RPS27A;RPS13;RPS12;RPL19;RPS8;RPL23;RPS5;RPS6;RPL13A;RPSA;RPS3A;RPL23A;RPS28;RPL27A;RPL37A;RPL29;RPL28;RPS24;RPS23
cn5	UP	Reactome_2022	Cap-dependent Translation Initiation R-HSA-72737	41/116	6.81279e-61	2.5402e-59	0	0	112.682	15610.8	RPL3;RPL32;RPLP1;RPLP0;RPL11;RPL36A;RPL10A;RPL8;RPL7;RPS15;RPS4X;RPS14;RPL7A;RPS17;RPS16;RPL18A;RPS19;RPS3;RPLP2;RPL15;RPS11;RPL18;RPS27A;RPS13;RPS12;RPL19;RPS8;RPL23;RPS5;RPS6;RPL13A;RPSA;RPS3A;RPL23A;RPS28;RPL27A;RPL37A;RPL29;RPL28;RPS24;RPS23
cn5	UP	Reactome_2022	Influenza Viral RNA Transcription And Replication R-HSA-168273	41/137	2.28252e-57	7.94317e-56	0	0	87.9391	11469.2	RPL3;RPL32;RPLP1;RPLP0;RPL11;RPL36A;RPL10A;RPL8;RPL7;RPS15;RPS4X;RPS14;RPL7A;RPS17;RPS16;RPL18A;RPS19;RPS3;RPLP2;RPL15;RPS11;RPL18;RPS27A;RPS13;RPS12;RPL19;RPS8;RPL23;RPS5;RPS6;RPL13A;RPSA;RPS3A;RPL23A;RPS28;RPL27A;RPL37A;RPL29;RPL28;RPS24;RPS23
cn5	UP	Reactome_2022	Cellular Response To Starvation R-HSA-9711097	41/153	4.25657e-55	1.38871e-53	0	0	75.3154	9429.01	RPL3;RPL32;RPLP1;RPLP0;RPL11;RPL36A;RPL10A;RPL8;RPL7;RPS15;RPS4X;RPS14;RPL7A;RPS17;RPS16;RPL18A;RPS19;RPS3;RPLP2;RPL15;RPS11;RPL18;RPS27A;RPS13;RPS12;RPL19;RPS8;RPL23;RPS5;RPS6;RPL13A;RPSA;RPS3A;RPL23A;RPS28;RPL27A;RPL37A;RPL29;RPL28;RPS24;RPS23
cn5	UP	Reactome_2022	Influenza Infection R-HSA-168255	41/157	1.42115e-54	4.36377e-53	0	0	72.7036	9014.38	RPL3;RPL32;RPLP1;RPLP0;RPL11;RPL36A;RPL10A;RPL8;RPL7;RPS15;RPS4X;RPS14;RPL7A;RPS17;RPS16;RPL18A;RPS19;RPS3;RPLP2;RPL15;RPS11;RPL18;RPS27A;RPS13;RPS12;RPL19;RPS8;RPL23;RPS5;RPS6;RPL13A;RPSA;RPS3A;RPL23A;RPS28;RPL27A;RPL37A;RPL29;RPL28;RPS24;RPS23
cn5	UP	Reactome_2022	Regulation Of Expression Of SLITs And ROBOs R-HSA-9010553	41/167	2.48621e-53	7.21e-52	0	0	66.8996	8103.29	RPL3;RPL32;RPLP1;RPLP0;RPL11;RPL36A;RPL10A;RPL8;RPL7;RPS15;RPS4X;RPS14;RPL7A;RPS17;RPS16;RPL18A;RPS19;RPS3;RPLP2;RPL15;RPS11;RPL18;RPS27A;RPS13;RPS12;RPL19;RPS8;RPL23;RPS5;RPS6;RPL13A;RPSA;RPS3A;RPL23A;RPS28;RPL27A;RPL37A;RPL29;RPL28;RPS24;RPS23
cn5	UP	Reactome_2022	Major Pathway Of rRNA Processing In Nucleolus And Cytosol R-HSA-6791226	41/179	5.98078e-52	1.64314e-50	0	0	61.0451	7200.01	RPL3;RPL32;RPLP1;RPLP0;RPL11;RPL36A;RPL10A;RPL8;RPL7;RPS15;RPS4X;RPS14;RPL7A;RPS17;RPS16;RPL18A;RPS19;RPS3;RPLP2;RPL15;RPS11;RPL18;RPS27A;RPS13;RPS12;RPL19;RPS8;RPL23;RPS5;RPS6;RPL13A;RPSA;RPS3A;RPL23A;RPS28;RPL27A;RPL37A;RPL29;RPL28;RPS24;RPS23
cn5	UP	Reactome_2022	rRNA Processing In Nucleus And Cytosol R-HSA-8868773	41/189	7.04839e-51	1.83963e-49	0	0	56.8915	6569.78	RPL3;RPL32;RPLP1;RPLP0;RPL11;RPL36A;RPL10A;RPL8;RPL7;RPS15;RPS4X;RPS14;RPL7A;RPS17;RPS16;RPL18A;RPS19;RPS3;RPLP2;RPL15;RPS11;RPL18;RPS27A;RPS13;RPS12;RPL19;RPS8;RPL23;RPS5;RPS6;RPL13A;RPSA;RPS3A;RPL23A;RPS28;RPL27A;RPL37A;RPL29;RPL28;RPS24;RPS23
cn5	UP	Reactome_2022	Signaling By ROBO Receptors R-HSA-376176	42/209	1.25011e-50	3.10742e-49	0	0	52.1419	5991.42	RPL3;RPL32;RPLP1;RPLP0;RPL11;RPL36A;RPL10A;RPL8;RPL7;RPS15;RPS4X;RPS14;RPL7A;RPS17;RPS16;RPL18A;RPS19;RPS3;RPLP2;RPL15;RPS11;RPL18;RPS27A;RPS13;RPS12;RPL19;RPS8;DCC;RPL23;RPS5;RPS6;RPL13A;RPSA;RPS3A;RPL23A;RPS28;RPL27A;RPL37A;RPL29;RPL28;RPS24;RPS23
cn5	UP	Reactome_2022	rRNA Processing R-HSA-72312	41/199	7.17818e-50	1.70319e-48	0	0	53.2638	6027.23	RPL3;RPL32;RPLP1;RPLP0;RPL11;RPL36A;RPL10A;RPL8;RPL7;RPS15;RPS4X;RPS14;RPL7A;RPS17;RPS16;RPL18A;RPS19;RPS3;RPLP2;RPL15;RPS11;RPL18;RPS27A;RPS13;RPS12;RPL19;RPS8;RPL23;RPS5;RPS6;RPL13A;RPSA;RPS3A;RPL23A;RPS28;RPL27A;RPL37A;RPL29;RPL28;RPS24;RPS23
cn5	UP	Reactome_2022	Translation R-HSA-72766	44/281	5.14559e-48	1.16783e-46	0	0	39.179	4266.04	RPL3;RPL32;RPLP1;RPLP0;RPL11;RPL36A;RPL10A;RPL8;RPL7;EEF1B2;RPS15;RPS4X;RPS14;RPL7A;RPS17;RPS16;RPL18A;RPS19;RPS3;RPLP2;RPL15;RPS11;RPL18;RPS27A;RPS13;RPS12;RPL19;SSR4;RPS8;RPL23;RPS5;RPS6;RPL13A;RPSA;RPS3A;RPL23A;EEF1G;RPS28;RPL27A;RPL37A;RPL29;RPL28;RPS24;RPS23
cn5	UP	Reactome_2022	Metabolism Of Amino Acids And Derivatives R-HSA-71291	43/364	2.05801e-41	4.47618e-40	0	0	27.8487	2608.98	RPL3;RPL32;SLC44A1;GLDC;RPLP1;RPLP0;RPL11;RPL36A;RPL10A;RPL8;RPL7;RPS15;RPS4X;RPS14;RPL7A;RPS17;RPS16;RPL18A;RPS19;RPS3;RPLP2;RPL15;RPS11;RPL18;RPS27A;RPS13;RPS12;RPL19;RPS8;RPL23;RPS5;RPS6;RPL13A;RPSA;RPS3A;RPL23A;RPS28;RPL27A;RPL37A;RPL29;RPL28;RPS24;RPS23
cn5	UP	Reactome_2022	Axon Guidance R-HSA-422475	45/519	2.45211e-37	5.12e-36	0	0	20.0079	1686.64	RPL3;RPL32;RPLP1;SEMA3A;RPLP0;RPL11;RPL36A;RPL10A;RPL8;RPL7;RPS15;RPS4X;RPS14;RPL7A;RPS17;RPS16;RPL18A;RPS19;RPS3;RPLP2;NCAM1;RPL15;RPS11;RPL18;RPS27A;RPS13;RPS12;RPL19;RPS8;DCC;RPL23;RPS5;SEMA6D;RPS6;RPL13A;RPSA;RPS3A;RPL23A;RPS28;RPL27A;RPL37A;RPL29;RPL28;RPS24;RPS23
cn5	UP	Reactome_2022	Nervous System Development R-HSA-9675108	45/545	2.16057e-36	4.33776e-35	0	0	18.9421	1555.57	RPL3;RPL32;RPLP1;SEMA3A;RPLP0;RPL11;RPL36A;RPL10A;RPL8;RPL7;RPS15;RPS4X;RPS14;RPL7A;RPS17;RPS16;RPL18A;RPS19;RPS3;RPLP2;NCAM1;RPL15;RPS11;RPL18;RPS27A;RPS13;RPS12;RPL19;RPS8;DCC;RPL23;RPS5;SEMA6D;RPS6;RPL13A;RPSA;RPS3A;RPL23A;RPS28;RPL27A;RPL37A;RPL29;RPL28;RPS24;RPS23
cn5	UP	Reactome_2022	SARS-CoV-2 Modulates Host Translation Machinery R-HSA-9754678	19/47	1.22358e-29	2.3656e-28	0	0	114.063	7593.55	RPS8;RPS5;RPS6;RPS3A;RPSA;RPS15;RPS4X;RPS14;RPS17;RPS28;RPS16;RPS19;RPS3;RPS11;RPS27A;RPS13;RPS24;RPS12;RPS23
cn5	UP	Reactome_2022	Formation Of Ternary Complex, And Subsequently, 43S Complex R-HSA-72695	19/50	5.24641e-29	9.78081e-28	0	0	103.009	6707.7	RPS8;RPS5;RPS6;RPS3A;RPSA;RPS15;RPS4X;RPS14;RPS17;RPS28;RPS16;RPS19;RPS3;RPS11;RPS27A;RPS13;RPS24;RPS12;RPS23
cn5	UP	Reactome_2022	Cellular Responses To Stress R-HSA-2262752	43/722	8.66026e-29	1.55885e-27	0	0	12.9244	835.125	RPL3;RPL32;RPLP1;RPLP0;RPL11;RPL36A;RPL10A;RPL8;RPL7;RPS15;RPS4X;RPS14;RPL7A;RPS17;RPS16;RPL18A;RPS19;RPS3;RPLP2;RPL15;RPS11;RPL18;RPS27A;RPS13;RPS12;RPL19;RPS8;RPL23;RPS5;RPS6;RPL13A;CYBA;RPSA;RPS3A;RPL23A;RPS28;RPL27A;RPL37A;MDM2;RPL29;RPL28;RPS24;RPS23
cn5	UP	Reactome_2022	Cellular Responses To Stimuli R-HSA-8953897	43/736	1.8966e-28	3.30009e-27	0	0	12.654	807.737	RPL3;RPL32;RPLP1;RPLP0;RPL11;RPL36A;RPL10A;RPL8;RPL7;RPS15;RPS4X;RPS14;RPL7A;RPS17;RPS16;RPL18A;RPS19;RPS3;RPLP2;RPL15;RPS11;RPL18;RPS27A;RPS13;RPS12;RPL19;RPS8;RPL23;RPS5;RPS6;RPL13A;CYBA;RPSA;RPS3A;RPL23A;RPS28;RPL27A;RPL37A;MDM2;RPL29;RPL28;RPS24;RPS23
cn5	UP	Reactome_2022	Metabolism Of RNA R-HSA-8953854	41/666	5.9478e-28	1.00153e-26	0	0	13.146	824.112	RPL3;RPL32;RPLP1;RPLP0;RPL11;RPL36A;RPL10A;RPL8;RPL7;RPS15;RPS4X;RPS14;RPL7A;RPS17;RPS16;RPL18A;RPS19;RPS3;RPLP2;RPL15;RPS11;RPL18;RPS27A;RPS13;RPS12;RPL19;RPS8;RPL23;RPS5;RPS6;RPL13A;RPSA;RPS3A;RPL23A;RPS28;RPL27A;RPL37A;RPL29;RPL28;RPS24;RPS23
cn5	UP	Reactome_2022	Ribosomal Scanning And Start Codon Recognition R-HSA-72702	19/57	1.05679e-27	1.67165e-26	0	0	84.0042	5217.89	RPS8;RPS5;RPS6;RPS3A;RPSA;RPS15;RPS4X;RPS14;RPS17;RPS28;RPS16;RPS19;RPS3;RPS11;RPS27A;RPS13;RPS24;RPS12;RPS23
cn5	UP	Reactome_2022	Translation Initiation Complex Formation R-HSA-72649	19/57	1.05679e-27	1.67165e-26	0	0	84.0042	5217.89	RPS8;RPS5;RPS6;RPS3A;RPSA;RPS15;RPS4X;RPS14;RPS17;RPS28;RPS16;RPS19;RPS3;RPS11;RPS27A;RPS13;RPS24;RPS12;RPS23
cn5	UP	Reactome_2022	mRNA Activation Upon Binding Of Cap-Binding Complex And eIFs, Subsequent Binding To 43S R-HSA-72662	19/58	1.56284e-27	2.39942e-26	0	0	81.8462	5051.81	RPS8;RPS5;RPS6;RPS3A;RPSA;RPS15;RPS4X;RPS14;RPS17;RPS28;RPS16;RPS19;RPS3;RPS11;RPS27A;RPS13;RPS24;RPS12;RPS23
cn5	UP	Reactome_2022	Infectious Disease R-HSA-5663205	46/961	8.24037e-27	1.22899e-25	0	0	10.4679	628.709	RPL3;CALCRL;RPL32;RPLP1;RPLP0;RPL11;RPL36A;RPL10A;RPL8;RPL7;RPS15;RPS4X;RPS14;RPL7A;RPS17;RPS16;RPL18A;RPS19;RPS3;RPLP2;RPL15;RPS11;RPL18;RPS27A;B2M;RPS13;RPS12;RPL19;ZBP1;RPS8;RPL23;RPS5;RPS6;RPL13A;CYBA;RPSA;RPS3A;RPL23A;RPS28;RPL27A;RPL37A;ELMO1;RPL29;RPL28;RPS24;RPS23
cn5	UP	Reactome_2022	Developmental Biology R-HSA-1266738	45/1073	8.02595e-24	1.16376e-22	0	0	8.96184	476.585	RPL3;RPL32;RPLP1;SEMA3A;RPLP0;RPL11;RPL36A;RPL10A;RPL8;RPL7;RPS15;RPS4X;RPS14;RPL7A;RPS17;RPS16;RPL18A;RPS19;RPS3;RPLP2;NCAM1;RPL15;RPS11;RPL18;RPS27A;RPS13;RPS12;RPL19;RPS8;DCC;RPL23;RPS5;SEMA6D;RPS6;RPL13A;RPSA;RPS3A;RPL23A;RPS28;RPL27A;RPL37A;RPL29;RPL28;RPS24;RPS23
cn5	UP	Reactome_2022	Disease R-HSA-1643685	49/1736	1.13798e-18	1.60548e-17	0	0	5.99925	247.872	RPL3;RPL32;RPLP1;RPLP0;RPL10A;RPL8;RPL7;RPS15;RPS4X;RPS14;RPL7A;RPS17;RPS16;RPL18A;RPS19;RPLP2;RPS11;B2M;RPS13;RPS12;ZBP1;RPS8;RPL23;RPS5;RPS6;RPL13A;CYBA;RPSA;RPS3A;EEF1G;RPL37A;ELMO1;RPL29;RPL28;CALCRL;RPL11;RPL36A;RPS3;RPL15;RPL18;RPS27A;RPL19;AGK;RPL23A;RPS28;RPL27A;MDM2;RPS24;RPS23
cn5	UP	Reactome_2022	SARS-CoV-2-host Interactions R-HSA-9705683	20/196	4.77548e-18	6.56e-17	0	0	19.121	762.604	RPS8;RPS5;RPS6;RPSA;RPS3A;RPS15;RPS4X;RPS14;RPS17;RPS28;RPS16;RPS19;RPS3;RPS11;RPS27A;B2M;RPS13;RPS24;RPS12;RPS23
cn5	UP	Reactome_2022	Metabolism Of Proteins R-HSA-392499	48/1890	2.03139e-16	2.71894e-15	0	0	5.27643	190.651	RPL3;RPL32;RPLP1;RPLP0;RPL11;RPL36A;RPL10A;RPL8;MANEA;RPL7;EEF1B2;RPS15;RPS4X;RPS14;RPL7A;RPS17;RPS16;RPL18A;RPS19;RPS3;RPLP2;ST3GAL6;RPL15;RPS11;RPL18;RPS27A;B2M;RPS13;RPS12;RPL19;SSR4;RPS8;RPL23;RPS5;RPS6;RPL13A;RPSA;RPS3A;RPL23A;EEF1G;RPS28;RPL27A;RPL37A;MDM2;RPL29;RPL28;RPS24;RPS23
cn5	UP	Reactome_2022	Metabolism R-HSA-1430728	48/2049	4.78496e-15	6.24437e-14	0	0	4.81431	158.744	RPL3;RPL32;SLC44A1;GLDC;RPLP1;RPLP0;RPL11;RPL36A;RPL10A;RPL8;RPL7;RPS15;RPS4X;RPS14;RPL7A;RPS17;ACOXL;RPS16;RPL18A;RPS19;RPS3;RPLP2;ST3GAL6;RPL15;RPS11;RPL18;RPS27A;RPS13;RPS12;RPL19;RPS8;AGK;RPL23;RPS5;RPS6;RPL13A;RPSA;RPS3A;RPL23A;RPS28;PRKD3;RPL27A;DPYD;RPL37A;RPL29;RPL28;RPS24;RPS23
cn5	UP	Reactome_2022	SARS-CoV-2 Infection R-HSA-9694516	20/283	6.22317e-15	7.92316e-14	0	0	12.7393	416.708	RPS8;RPS5;RPS6;RPSA;RPS3A;RPS15;RPS4X;RPS14;RPS17;RPS28;RPS16;RPS19;RPS3;RPS11;RPS27A;B2M;RPS13;RPS24;RPS12;RPS23
cn5	UP	Reactome_2022	SARS-CoV Infections R-HSA-9679506	21/369	9.00307e-14	1.11895e-12	0	0	10.152	304.951	ZBP1;RPS8;RPS5;RPS6;RPSA;RPS3A;RPS15;RPS4X;RPS14;RPS17;RPS28;RPS16;RPS19;RPS3;RPS11;RPS27A;B2M;RPS13;RPS24;RPS12;RPS23
cn5	UP	WikiPathways_2019_Human	Cytoplasmic Ribosomal Proteins WP477	45/89	5.04749e-76	5.24939e-74	0	0	220.32	38198.5	RPL3;RPL32;RPL10;RPLP1;RPLP0;RPL11;RPL36A;RPL10A;RPL8;RPL7;RPS4X;RPS15;RPL7A;RPS14;RPS17;RPS16;RPL18A;RPS19;RPS18;RPS3;RPLP2;RPL13;RPL15;RPS11;RPL18;RPS27A;RPS13;RPS12;RPL19;RPS8;RPL23;RPS5;RPS6;RPL13A;RPS3A;RPSA;RPL23A;RPS28;RPL27A;RPL37A;RPL24;RPL29;RPL28;RPS24;RPS23

## Sheet: Down-regulated pathways
Significantly enriched pathways among genes down-regulated in each MM-01-0288 subclone
Subclone	Up.Down	Database	Term	Overlap	P.value	Adjusted.P.value	Old.P.value	Old.Adjusted.P.value	Odds.Ratio	Combined.Score	Genes
cn1	DOWN	WikiPathways_2019_Human	Cytoplasmic Ribosomal Proteins WP477	76/89	2.94402e-124	5.44644e-122	0	0	438.439	124710	RPL4;RPL30;RPL3;RPL32;RPL31;RPL34;RPLP1;RPLP0;RPL10A;RPL8;RPL9;RPL6;RPL7;RPS4X;RPS15;RPL7A;RPS14;RPS17;RPS16;RPL18A;RPS19;RPS18;RPL36;RPL35;RPLP2;RPL37;RPS11;RPL39;RPS13;RPS12;RPS9;RPL21;RPS7;RPS8;RPL23;RPS5;RPL22;RPS6;RPL13A;RPS3A;RPSA;RPL37A;RPL24;RPL27;RPL26;RPL29;RPL28;UBA52;RPL10;RPL12;RPL11;RPL36A;RPS15A;RPL14;RPS3;RPL13;RPL15;RPS2;RPL18;RPS27A;RPL17;RPL19;RPL41;RPL35A;RPL23A;RPS26;RPS25;RP…
cn1	DOWN	WikiPathways_2019_Human	G13 Signaling Pathway WP524	5/39	0.000480709	0.0315175	0	0	8.66808	66.2263	CFL1;IQGAP2;PFN1;CALM1;CALM2
cn1	DOWN	WikiPathways_2019_Human	Proteasome Degradation WP183	6/62	0.000617949	0.0315175	0	0	6.32724	46.7526	UBB;H2AFZ;UBC;HLA-C;HLA-A;PSMA7
cn1	DOWN	WikiPathways_2019_Human	Common Pathways Underlying Drug Addiction WP2636	5/42	0.00068146	0.0315175	0	0	7.96405	58.068	PRKCB;CALM1;CALM2;ACTB;ACTG1
cn2	DOWN	KEGG_2021_Human	Rap1 signaling pathway	8/210	0.000101475	0.00950715	0	0	6.03607	55.5059	RAP1B;PRKCB;PRKD3;MAGI3;MAGI2;IGF1;RAPGEF5;RAPGEF4
cn2	DOWN	KEGG_2021_Human	Mitophagy	5/68	0.000103339	0.00950715	0	0	11.9048	109.256	EIF2AK3;FOXO3;SQSTM1;TBC1D15;RAB7A
cn2	DOWN	KEGG_2021_Human	Glioma	5/75	0.00016467	0.0100998	0	0	10.7105	93.3052	CAMK1D;CDK6;PRKCB;PLCG2;IGF1
cn2	DOWN	KEGG_2021_Human	mTOR signaling pathway	6/154	0.000678296	0.02809	0	0	6.1012	44.5139	CAB39;PRKCB;RICTOR;IGF1;FNIP1;FNIP2
cn2	DOWN	KEGG_2021_Human	Leukocyte transendothelial migration	5/114	0.00113223	0.0347217	0	0	6.86475	46.5675	RAP1B;ITGA4;PRKCB;PLCG2;RAPGEF4
cn2	DOWN	Reactome_2022	Diseases Of Signal Transduction By Growth Factor Receptors And Second Messengers R-HSA-5663202	14/424	1.32463e-06	0.000739142	0	0	5.4004	73.091	FBXW7;EIF2AK3;FOXO3;HDAC9;ETV6;RAP1B;GOLGA4;BCL2L11;NRG3;PSME4;RICTOR;TBL1X;SQSTM1;MARK3
cn2	DOWN	WikiPathways_2019_Human	VEGFA-VEGFR2 Signaling Pathway WP3888	11/236	7.0221e-07	0.000113056	0	0	7.61968	107.964	ERN1;RAP1B;MEF2C;PRKCB;EIF2AK3;PLA2G4A;RICTOR;FOXO3;HDAC9;PRKG1;MAP3K5
cn2	DOWN	WikiPathways_2019_Human	MicroRNAs in cardiomyocyte hypertrophy WP1544	5/84	0.000280408	0.0150486	0	0	9.486	77.5885	PRKCB;IGF1;IL6ST;HDAC9;PRKG1
cn2	DOWN	WikiPathways_2019_Human	Corticotropin-releasing hormone signaling pathway WP2355	5/93	0.000449418	0.0180891	0	0	8.51197	65.6065	ERN1;RAP1B;PRKCB;PLCG2;MAP3K5
cn2	DOWN	WikiPathways_2019_Human	Brain-Derived Neurotrophic Factor (BDNF) signaling pathway WP2380	5/144	0.00315228	0.0461379	0	0	5.37497	30.9579	MEF2C;BCL2L11;NCAM1;FOXO3;SQSTM1
cn5	DOWN	KEGG_2021_Human	B cell receptor signaling pathway	7/81	2.02237e-06	0.00034987	0	0	13.5592	177.778	VAV3;NFKBIA;MAP2K1;PLCG2;FOS;NFKB1;RASGRP3
cn5	DOWN	KEGG_2021_Human	Pathogenic Escherichia coli infection	9/197	1.39079e-05	0.000756013	0	0	6.92283	77.4184	NFKBIA;MYO1E;TUBB6;MYO6;MYO5A;RIPK1;FOS;SEC24D;NFKB1
cn5	DOWN	KEGG_2021_Human	Salmonella infection	10/249	1.41511e-05	0.000756013	0	0	6.07965	67.8837	NFKBIA;MAP2K4;TUBB6;MAP2K1;RALA;MYO6;RIPK1;FOS;NFKB1;RAB7A
cn5	DOWN	KEGG_2021_Human	TNF signaling pathway	7/112	1.74801e-05	0.000756013	0	0	9.54106	104.517	NFKBIA;MAP2K4;MAP2K1;IL15;RIPK1;FOS;NFKB1
cn5	DOWN	KEGG_2021_Human	Yersinia infection	7/137	6.38492e-05	0.00220918	0	0	7.69649	74.3403	NFKBIA;VAV3;RPS6KA3;MAP2K4;MAP2K1;FOS;NFKB1
cn5	DOWN	KEGG_2021_Human	Apoptosis	7/142	8.00756e-05	0.00230885	0	0	7.40955	69.8909	ERN1;NFKBIA;MAP2K1;RIPK1;FOS;NFKB1;MCL1
cn5	DOWN	KEGG_2021_Human	Toll-like receptor signaling pathway	6/104	0.00011082	0.00273884	0	0	8.70225	79.2566	NFKBIA;MAP2K4;MAP2K1;RIPK1;FOS;NFKB1
cn5	DOWN	KEGG_2021_Human	Proteoglycans in cancer	8/205	0.000127527	0.00275776	0	0	5.82697	52.2515	VAV3;MAP2K1;DDX5;COL1A2;PPP1R12A;FZD6;PLCG2;CD44
cn5	DOWN	KEGG_2021_Human	Relaxin signaling pathway	6/129	0.00035831	0.00688751	0	0	6.92472	54.9415	NFKBIA;MAP2K4;MAP2K1;COL1A2;FOS;NFKB1
cn5	DOWN	KEGG_2021_Human	mTOR signaling pathway	6/154	0.000912409	0.0146156	0	0	5.74772	40.2307	RPS6KA3;MAP2K1;CAB39;SESN2;FZD6;FNIP2
cn5	DOWN	KEGG_2021_Human	T cell receptor signaling pathway	5/104	0.000966667	0.0146156	0	0	7.12698	49.4731	NFKBIA;VAV3;MAP2K1;FOS;NFKB1
cn5	DOWN	KEGG_2021_Human	cAMP signaling pathway	7/216	0.00102017	0.0146156	0	0	4.76812	32.8418	NFKBIA;VAV3;MAP2K1;PPP1R12A;FOS;NFKB1;RAPGEF4
cn5	DOWN	KEGG_2021_Human	Th17 cell differentiation	5/107	0.00109828	0.0146156	0	0	6.91632	47.1278	NFKBIA;IRF4;FOS;NFKB1;RUNX1
cn5	DOWN	KEGG_2021_Human	Neurotrophin signaling pathway	5/119	0.00176073	0.0190379	0	0	6.18452	39.2224	NFKBIA;RPS6KA3;MAP2K1;PLCG2;NFKB1
cn5	DOWN	KEGG_2021_Human	Osteoclast differentiation	5/127	0.00234064	0.0224962	0	0	5.77664	34.991	NFKBIA;MAP2K1;PLCG2;FOS;NFKB1
cn5	DOWN	KEGG_2021_Human	Kaposi sarcoma-associated herpesvirus infection	6/193	0.00286775	0.0261116	0	0	4.53999	26.5781	NFKBIA;MAP2K4;MAP2K1;PLCG2;FOS;NFKB1
cn5	DOWN	KEGG_2021_Human	Autophagy	5/137	0.00324722	0.0280663	0	0	5.33631	30.5768	ERN1;VMP1;MAP2K1;RB1CC1;RAB7A
cn5	DOWN	KEGG_2021_Human	Epstein-Barr virus infection	6/202	0.00358853	0.0282189	0	0	4.32954	24.3754	NFKBIA;MAP2K4;PLCG2;RIPK1;NFKB1;CD44
cn5	DOWN	KEGG_2021_Human	Rap1 signaling pathway	6/210	0.00433532	0.0312504	0	0	4.15806	22.6239	VAV3;MAP2K1;RALA;MAGI3;RASGRP3;RAPGEF4
cn5	DOWN	KEGG_2021_Human	Human immunodeficiency virus 1 infection	6/212	0.00453871	0.0314079	0	0	4.11727	22.2132	NFKBIA;MAP2K1;PLCG2;RIPK1;FOS;NFKB1
cn5	DOWN	KEGG_2021_Human	Lipid and atherosclerosis	6/215	0.00485689	0.032317	0	0	4.05755	21.616	ERN1;NFKBIA;VAV3;MAP2K4;FOS;NFKB1
cn5	DOWN	KEGG_2021_Human	Human T-cell leukemia virus 1 infection	6/219	0.0053063	0.0334309	0	0	3.98055	20.8535	NFKBIA;MAP2K4;MAP2K1;IL15;FOS;NFKB1
cn5	DOWN	KEGG_2021_Human	Pathways in cancer	10/531	0.00541078	0.0334309	0	0	2.74884	14.3472	NFKBIA;MAP2K1;RALA;IL15;FZD6;PLCG2;FOS;NFKB1;RUNX1;RASGRP3
cn5	DOWN	KEGG_2021_Human	Hepatitis B	5/162	0.00658035	0.0377267	0	0	4.48089	22.5105	NFKBIA;MAP2K4;MAP2K1;FOS;NFKB1
cn5	DOWN	KEGG_2021_Human	Ras signaling pathway	6/232	0.00697836	0.0377267	0	0	3.74909	18.614	MAP2K1;RALA;PLCG2;RGL1;NFKB1;RASGRP3
cn5	DOWN	KEGG_2021_Human	Protein processing in endoplasmic reticulum	5/171	0.00821774	0.0430809	0	0	4.23602	20.3391	ERN1;ERO1B;SEL1L;RRBP1;SEC24D
cn5	DOWN	MSigDB_Hallmark_2020	Protein Secretion	8/96	4.86749e-07	1.60627e-05	0	0	13.1168	190.659	RPS6KA3;ARFGEF2;GOLGA4;CLTC;AP3B1;ARFGAP3;SEC24D;PAM
cn5	DOWN	MSigDB_Hallmark_2020	TNF-alpha Signaling via NF-kB	8/200	0.00010751	0.00177392	0	0	5.98023	54.6469	NFKBIA;NAMPT;FOS;CCNL1;ATF3;NFKB1;CD44;MCL1
cn5	DOWN	MSigDB_Hallmark_2020	UV Response Dn	6/144	0.000642447	0.00706691	0	0	6.16734	45.3314	ATXN1;COL1A2;DYRK1A;NR3C1;NFKB1;RUNX1
cn5	DOWN	MSigDB_Hallmark_2020	PI3K/AKT/mTOR Signaling	5/105	0.00100916	0.00832556	0	0	7.05536	48.6724	VAV3;RPS6KA3;CAB39;CLTC;RIPK1
cn5	DOWN	MSigDB_Hallmark_2020	Interferon Gamma Response	6/200	0.00341784	0.0225577	0	0	4.37462	24.8424	NFKBIA;IL15;IRF4;NAMPT;RIPK1;NFKB1
cn5	DOWN	Reactome_2022	Diseases Of Signal Transduction By Growth Factor Receptors And Second Messengers R-HSA-5663202	15/424	4.74136e-07	0.000248447	0	0	5.48599	79.8857	MAP2K1;TNKS;SEL1L;FZD6;CLTC;AP3B1;NRG1;RRBP1;HDAC9;SND1;SPRED2;GOLGA4;SPRED1;PPP2R5E;GOLGB1
cn5	DOWN	Reactome_2022	Toll Like Receptor 4 (TLR4) Cascade R-HSA-166016	8/140	8.38574e-06	0.00147786	0	0	8.72506	101.987	NFKBIA;RPS6KA3;MAP2K4;MAP2K1;PLCG2;RIPK1;FOS;NFKB1
cn5	DOWN	Reactome_2022	Toll Like Receptor 3 (TLR3) Cascade R-HSA-168164	7/103	1.00925e-05	0.00147786	0	0	10.4403	120.102	NFKBIA;RPS6KA3;MAP2K4;MAP2K1;RIPK1;FOS;NFKB1
cn5	DOWN	Reactome_2022	MyD88-independent TLR4 Cascade R-HSA-166166	7/107	1.29663e-05	0.00147786	0	0	10.0207	112.764	NFKBIA;RPS6KA3;MAP2K4;MAP2K1;RIPK1;FOS;NFKB1
cn5	DOWN	Reactome_2022	Vesicle-mediated Transport R-HSA-5653656	16/637	1.59642e-05	0.00147786	0	0	3.84157	42.4307	RALA;DENND4A;CLTC;MYO5A;AP3B1;ARFGAP3;MYO1E;GOLGA4;SCFD1;COL1A2;GOLGB1;CAPZA1;MYO6;RAB3GAP2;SEC24D;RAB7A
cn5	DOWN	Reactome_2022	Disease R-HSA-1643685	29/1736	1.69221e-05	0.00147786	0	0	2.65788	29.2018	DDX5;TNKS;SEL1L;CLTC;ARID4B;RRBP1;NR3C1;HDAC9;SPRED2;GOLGA4;SPRED1;PPP2R5E;PLCG2;RIPK1;ERC2;VAV3;MAP2K4;MAP2K1;FZD6;MYO5A;AP3B1;NRG1;SND1;NFKB1;NFKBIA;MYO1E;GOLGB1;SEC24D;RAB7A
cn5	DOWN	Reactome_2022	Toll-like Receptor Cascades R-HSA-168898	8/162	2.42543e-05	0.00174973	0	0	7.47028	79.3861	NFKBIA;RPS6KA3;MAP2K4;MAP2K1;PLCG2;RIPK1;FOS;NFKB1
cn5	DOWN	Reactome_2022	Signaling By Interleukins R-HSA-449147	13/453	2.67135e-05	0.00174973	0	0	4.34564	45.7611	MAP2K4;MAP2K1;RALA;ANXA1;IL15;FOS;NFKB1;NFKBIA;RPS6KA3;COL1A2;IRF4;CAPZA1;MCL1
cn5	DOWN	Reactome_2022	Membrane Trafficking R-HSA-199991	15/599	3.08964e-05	0.00179886	0	0	3.80749	39.5403	RALA;DENND4A;CLTC;MYO5A;AP3B1;ARFGAP3;MYO1E;GOLGA4;SCFD1;GOLGB1;CAPZA1;MYO6;RAB3GAP2;SEC24D;RAB7A
cn5	DOWN	Reactome_2022	MyD88 Cascade Initiated On Plasma Membrane R-HSA-975871	6/96	7.09933e-05	0.00338186	0	0	9.47962	90.5581	NFKBIA;RPS6KA3;MAP2K4;MAP2K1;FOS;NFKB1
cn5	DOWN	Reactome_2022	MAP Kinase Activation R-HSA-450294	5/62	8.67475e-05	0.00366965	0	0	12.4048	116.016	RPS6KA3;MAP2K4;MAP2K1;FOS;NFKB1
cn5	DOWN	Reactome_2022	TRAF6 Mediated Induction Of NFkB And MAP Kinases Upon TLR7/8 Or 9 Activation R-HSA-975138	6/101	9.42187e-05	0.00366965	0	0	8.97842	83.229	NFKBIA;RPS6KA3;MAP2K4;MAP2K1;FOS;NFKB1
cn5	DOWN	Reactome_2022	MyD88 Dependent Cascade Initiated On Endosome R-HSA-975155	6/102	9.95159e-05	0.00366965	0	0	8.88444	81.8718	NFKBIA;RPS6KA3;MAP2K4;MAP2K1;FOS;NFKB1
cn5	DOWN	Reactome_2022	Toll Like Receptor 7/8 (TLR7/8) Cascade R-HSA-168181	6/103	0.000105047	0.00366965	0	0	8.79241	80.5481	NFKBIA;RPS6KA3;MAP2K4;MAP2K1;FOS;NFKB1
cn5	DOWN	Reactome_2022	Toll Like Receptor 9 (TLR9) Cascade R-HSA-168138	6/106	0.000123122	0.00398956	0	0	8.52734	76.766	NFKBIA;RPS6KA3;MAP2K4;MAP2K1;FOS;NFKB1
cn5	DOWN	Reactome_2022	Immune System R-HSA-168256	29/1943	0.000130106	0.00398956	0	0	2.34339	20.9667	RALA;CAB39;CLTC;RASGRP3;NPEPPS;RPS6KA3;PPP2R5E;TRIM2;PLCG2;RIPK1;MCL1;VAV3;MAP2K4;MAP2K1;ANXA1;IL15;UBE2E2;MYO5A;FOS;NFKB1;NFKBIA;MYO1E;COL1A2;IRF4;CAPZA1;SEC24D;CD44;RAB7A;RAPGEF4
cn5	DOWN	Reactome_2022	Signal Transduction R-HSA-162582	34/2465	0.000143394	0.00398956	0	0	2.19543	19.4293	DDX5;RALA;CAB39;TNKS;SEL1L;CLTC;NR3C1;HDAC9;CDC14A;RASGRP3;RPS6KA3;AKAP13;SPRED2;SCFD1;SPRED1;PPP2R5E;MYO6;PLCG2;RIPK1;TMED5;VAV3;MAP2K1;ANXA1;PPP1R12A;FZD6;NRG1;FOS;ARFGAP3;NFKB1;RUNX1;NFKBIA;COL1A2;RAB7A;RAPGEF4
cn5	DOWN	Reactome_2022	Interleukin-17 Signaling R-HSA-448424	5/69	0.00014466	0.00398956	0	0	11.0441	97.6422	RPS6KA3;MAP2K4;MAP2K1;FOS;NFKB1
cn5	DOWN	Reactome_2022	MyD88:MAL(TIRAP) Cascade Initiated On Plasma Membrane R-HSA-166058	6/112	0.000166642	0.00436603	0	0	8.04222	69.9645	NFKBIA;RPS6KA3;MAP2K4;MAP2K1;FOS;NFKB1
cn5	DOWN	Reactome_2022	Cytokine Signaling In Immune System R-HSA-1280215	15/702	0.000181358	0.00452531	0	0	3.21935	27.7348	MAP2K4;MAP2K1;RALA;ANXA1;IL15;FOS;NFKB1;NFKBIA;RPS6KA3;COL1A2;IRF4;TRIM2;CAPZA1;CD44;MCL1
cn5	DOWN	Reactome_2022	Oncogenic MAPK Signaling R-HSA-6802957	5/78	0.00025792	0.00563125	0	0	9.67808	79.9686	SPRED2;SPRED1;MAP2K1;AP3B1;SND1
cn5	DOWN	Reactome_2022	Fc Epsilon Receptor (FCERI) Signaling R-HSA-2454202	6/130	0.000373434	0.00782718	0	0	6.86853	54.2117	NFKBIA;VAV3;MAP2K4;PLCG2;FOS;NFKB1
cn5	DOWN	Reactome_2022	Interleukin-4 And Interleukin-13 Signaling R-HSA-6785807	5/107	0.00109828	0.0191834	0	0	6.91632	47.1278	COL1A2;ANXA1;IRF4;FOS;MCL1
cn5	DOWN	Reactome_2022	Signaling By NTRK1 (TRKA) R-HSA-187037	5/114	0.00145663	0.0246218	0	0	6.46986	42.2587	RPS6KA3;MAP2K1;RALA;CLTC;FOS
cn5	DOWN	Reactome_2022	Signaling By NTRKs R-HSA-166520	5/132	0.00276711	0.0414276	0	0	5.54781	32.6763	RPS6KA3;MAP2K1;RALA;CLTC;FOS
cn5	DOWN	Reactome_2022	ER To Golgi Anterograde Transport R-HSA-199977	5/133	0.00285872	0.0416103	0	0	5.50419	32.2401	SCFD1;GOLGB1;CAPZA1;ARFGAP3;SEC24D
cn5	DOWN	Reactome_2022	Death Receptor Signaling R-HSA-73887	5/139	0.00345511	0.0489318	0	0	5.25613	29.7912	NFKBIA;VAV3;AKAP13;RIPK1;NFKB1
cn5	DOWN	WikiPathways_2019_Human	Structural Pathway of Interleukin 1 (IL-1) WP2637	5/49	2.75694e-05	0.00211933	0	0	16.0804	168.825	NFKBIA;MAP2K4;MAP2K1;FOS;NFKB1
cn5	DOWN	WikiPathways_2019_Human	Apoptosis WP254	6/84	3.34249e-05	0.00211933	0	0	10.9447	112.798	NFKBIA;MAP2K4;IRF4;RIPK1;NFKB1;MCL1
cn5	DOWN	WikiPathways_2019_Human	Cardiac Hypertrophic Response WP2795	5/55	4.85706e-05	0.00211933	0	0	14.1464	140.509	MAP2K4;MAP2K1;NRG1;HDAC9;NFKB1
cn5	DOWN	WikiPathways_2019_Human	T-Cell antigen Receptor (TCR) Signaling Pathway WP69	6/90	4.94069e-05	0.00211933	0	0	10.1598	100.739	VAV3;NFKBIA;MAP2K1;IRF4;FOS;NFKB1
cn5	DOWN	WikiPathways_2019_Human	VEGFA-VEGFR2 Signaling Pathway WP3888	9/236	5.74456e-05	0.00211933	0	0	5.72208	55.8742	ERN1;NFKBIA;MAP2K4;MAP2K1;ANXA1;MYO6;CLTC;HDAC9;NFKB1
cn5	DOWN	WikiPathways_2019_Human	Corticotropin-releasing hormone signaling pathway WP2355	6/93	5.94203e-05	0.00211933	0	0	9.80799	95.4403	ERN1;NFKBIA;MAP2K1;PLCG2;FOS;NFKB1
cn5	DOWN	WikiPathways_2019_Human	B Cell Receptor Signaling Pathway WP23	6/97	7.52268e-05	0.00229979	0	0	9.37497	89.0154	NFKBIA;MAP2K1;IRF4;PLCG2;NFKB1;RASGRP3
cn5	DOWN	WikiPathways_2019_Human	Toll-like Receptor Signaling Pathway WP75	6/103	0.000105047	0.00281002	0	0	8.79241	80.5481	NFKBIA;MAP2K4;MAP2K1;RIPK1;FOS;NFKB1
cn5	DOWN	WikiPathways_2019_Human	MicroRNAs in cardiomyocyte hypertrophy WP1544	5/84	0.000364289	0.00779579	0	0	8.94033	70.7856	MAP2K4;MAP2K1;NRG1;HDAC9;NFKB1
cn5	DOWN	WikiPathways_2019_Human	Apoptosis Modulation and Signaling WP1772	5/91	0.000526967	0.00806583	0	0	8.20972	61.97	NFKBIA;RIPK1;FOS;NFKB1;MCL1
cn5	DOWN	WikiPathways_2019_Human	Regulation of toll-like receptor signaling pathway WP1449	6/139	0.000533206	0.00806583	0	0	6.40082	48.2405	NFKBIA;MAP2K4;MAP2K1;RIPK1;FOS;NFKB1
cn5	DOWN	WikiPathways_2019_Human	Brain-Derived Neurotrophic Factor (BDNF) signaling pathway WP2380	6/144	0.000642447	0.00806583	0	0	6.16734	45.3314	NFKBIA;VAV3;RPS6KA3;MAP2K1;FOS;NFKB1
cn5	DOWN	WikiPathways_2019_Human	Ras Signaling WP4223	6/184	0.00226134	0.0151783	0	0	4.77172	29.0684	MAP2K1;RALA;PLCG2;RGL1;NFKB1;RASGRP3
cn5	DOWN	WikiPathways_2019_Human	TGF-beta Signaling Pathway WP366	5/132	0.00276711	0.0174165	0	0	5.54781	32.6763	MAP2K4;MAP2K1;COL1A2;FOS;ATF3
cn5	DOWN	WikiPathways_2019_Human	EGF/EGFR Signaling Pathway WP437	5/162	0.00658035	0.0320044	0	0	4.48089	22.5105	VAV3;RPS6KA3;MAP2K1;RALA;FOS
cn5	DOWN	WikiPathways_2019_Human	MAPK Signaling Pathway WP382	6/246	0.00917456	0.0400685	0	0	3.52788	16.5504	RPS6KA3;MAP2K4;MAP2K1;FOS;NFKB1;RASGRP3
