# Supplementary material for: Acquired resistance to bispecific antibodies by genetic or epigenetic inactivation of the target in multiple myeloma
Source: Research Square preprint supplement (doi:10.21203/rs.3.rs-2573797/v1), 2023-06-14
Supplement: Supplementary file 2 [file 3c6f2fcdf1b91ecf88a36c2e.xlsx]

## Sheet: Feuil1
Supplementary Table 5: ATAC-seq peaks significantly closed in the two GPRC5D-silenced relapses and/or linked with GPRC5D expression in the single-nucleus profiles of 65,700 cells (2 normal BM and 7 MM)
Chromosome	Start	End	Nearest Gene	Distance to gene start	Peak type	Nearest TSS	Distance to TSS	Linked to GPRC5D expression (peak2genelinkage)	Linked peak correlation	Linked peak FDR	Significantly less accessible in the 2 relapses with GPRC5D silencing	Accessibility Log2FC	Accessibility FDR	GeneHancer ID	GeneHancer type	Overlapping ENCODE cis-regulatory elements	Interaction strength with GPRC5D promoter in GM12878 PC-HIC data (Misfud 2015 data)
chr12	12836934	12837434	GPRC5A	53597	Distal	uc058ljm.1	12798	no			yes	-2.88368929661979	1.25874171611889E-14	GH12J012834	Promoter/Enhancer	EH38D2531203-EH38E1593882,dELS,CTCF-bound	9.31260677856667
chr12	12891072	12891572	GPRC5A	539	Exonic	uc058ljn.1	236	no			yes	-3.97340708110136	1.68637979275548E-23	GH12J012887	Promoter/Enhancer	EH38D4673132-EH38E3004211,PLS,CTCF-bound	NA
chr12	12899474	12899974	GPRC5A	8941	Intronic	uc058ljp.1	7749	no			yes	-5.57710977090279	1.24787200707461E-27	NA		EH38D4673144-EH38E3004221,dELS	10.277841360406
chr12	12916183	12916683	MIR614	603	Exonic	uc001rbb.4	603	no			yes	-1.59216079850524	2.86222308629369E-06	NA		EH38D4673177-EH38E3004247,pELS,CTCF-bound	NA
chr12	12927508	12928008	GPRC5D-AS1	31	Promoter	uc058ljt.1	0	no			yes	-3.99934113568116	2.15654651369437E-06	GH12J012924	Promoter/Enhancer	EH38D4673187-EH38E3004255,PLS,CTCF-bound	NA
chr12	12946620	12947120	GPRC5D	3513	Intronic	uc058ljx.1	280	no			yes	-3.30780026979127	0.0000904534898292915	NA		EH38D4673209-EH38E3004264,dELS	NA
chr12	12949850	12950350	GPRC5D	283	Exonic	uc010shp.2	283	no			yes	-2.22833780181761	0.00634935284531634	NA		NA	NA
chr12	12950922	12951422	GPRC5D	787	Promoter	uc010shp.2	787	yes	0.495116793786679	9.3831747308309e-31	yes	-2.32320792820835	2.95379488241025E-07	NA		EH38D2531332-EH38E1593998,pELS	NA
chr12	12951992	12952492	GPRC5D	1857	Promoter	uc058ljz.1	94	yes	0.566040611590204	7.24111957881435e-42	yes	-5.35163852085606	1.21775267286625E-17	GH12J012952	Promoter	EH38D4673214-EH38E3004266,pELS	NA
chr12	12975643	12976143	HEBP1	24379	Intronic	uc058lkb.1	3839	yes	0.584544410954962	3.09165820841868e-45	yes	-3.50026668325631	0.0000012099417029406	NA		EH38D4673220-EH38E3004270,dELS,CTCF-bound	NA
chr12	12985974	12986474	HEBP1	14048	Exonic	uc058lke.1	3055	no			yes	-1.73757740430873	0.0393305991876718	NA		EH38D2531356-EH38E1594018,CTCF-only,CTCF-bound	10.2599931997432
chr12	12992720	12993220	HEBP1	7302	Intronic	uc058lke.1	3689	no			yes	-1.13566426872773	0.0282572874635115	NA		EH38D4673233-EH38E3004281,dELS	10.011687612728
chr12	13044124	13044624	FAM234B	89	Promoter	uc058lkg.1	6	no			yes	-1.79611263456347	3.21995512286237E-11	NA		EH38D4673287-EH38E3004325,PLS,CTCF-bound	8.15288308997517
chr12	13094259	13094759	GSG1	9173	Intronic	uc001rbm.4	1138	no			yes	-3.87422777772469	7.86801627542196E-18	NA		EH38D2531485-EH38E1594126,pELS	NA
chr12	13100318	13100818	GSG1	3114	Intronic	uc058lkk.1	3073	no			yes	-2.21280210234964	0.000112015988493177	NA		EH38D4673335-EH38E3004370,dELS	NA
chr12	13101961	13102461	GSG1	1471	Intronic	uc058lkk.1	1430	no			yes	-2.44231262977821	2.49533187204691E-08	NA		EH38D4673340-EH38E3004375,pELS	NA
chr12	13103350	13103850	GSG1	82	Promoter	uc058lkk.1	41	no			yes	-4.87664754120897	7.62814527273924E-18	NA		EH38D4673342-EH38E3004377,PLS	NA
chr12	13126517	13127017	GSG1	23083	Intronic	uc058lkl.1	23083	no			yes	-2.37076707061901	0.0119131301199963	NA		NA	9.68463213323845
chr12	13154044	13154544	EMP1	42421	Distal	uc001rbr.4	42421	no			yes	-3.91808456578941	5.08178427919773E-08	NA		EH38D4673376-EH38E3004403,dELS	9.90159634412421
chr12	13160850	13161350	EMP1	35615	Distal	uc001rbr.4	35615	no			yes	-2.01364415720046	0.006412847239242	NA		EH38D4673380-EH38E3004405,CTCF-only,CTCF-bound	9.93434914108713
chr12	13165458	13165958	EMP1	31007	Distal	uc001rbr.4	31007	no			yes	-4.57314161372959	6.79230850613386E-43	NA		EH38D2531583-EH38E1594208,dELS,CTCF-bound	9.04298943792818
chr12	13172393	13172893	EMP1	24072	Distal	uc001rbr.4	24072	no			yes	-5.40213745753519	9.03699663764356E-14	NA		EH38D4673390-EH38E3004413,dELS	9.40979202226147
chr12	13173474	13173974	EMP1	22991	Distal	uc001rbr.4	22991	no			yes	-5.75660195495974	2.61639518990708E-36	NA		EH38D2531597-EH38E1594219,dELS,CTCF-bound	9.40979202226147
chr12	13179657	13180157	EMP1	16808	Distal	uc001rbr.4	16808	no			yes	-3.73562395169383	8.51375072180197E-24	NA		EH38D4673398-EH38E3004421,dELS,CTCF-bound	9.30168055385572
chr12	13187239	13187739	EMP1	9226	Distal	uc001rbr.4	9226	no			yes	-5.30350258717484	4.7709088236425E-13	NA		EH38D2531620-EH38E1594239,dELS,CTCF-bound	8.96892659315288
chr12	13194701	13195201	EMP1	1764	Promoter	uc001rbr.4	1764	no			yes	-2.93345957393103	0.0000595671651883317	GH12J013193	Promoter/Enhancer	EH38D2531627-EH38E1594245,pELS	NA
chr12	13196337	13196837	EMP1	128	Promoter	uc001rbr.4	128	no			yes	-4.8158898924919	3.27635892349209E-65	GH12J013193	Promoter/Enhancer	EH38D4673416-EH38E3004437,PLS,CTCF-bound	NA
chr12	13209354	13209854	EMP1	12887	Intronic	uc058lkt.1	1906	no			yes	-3.94106906577302	0.0000133232091812688	GH12J013193	Promoter/Enhancer	EH38D4673432-EH38E3004452,pELS	9.53968379732735
chr12	13241754	13242254	EMP1	45287	Distal	uc058lkv.1	28551	no			yes	-3.27760519954195	0.00396367741825745	NA		EH38D4673464-EH38E3004478,dELS	9.44712244528288
chr12	13254272	13254772	EMP1	57805	Distal	uc058lkv.1	41069	yes	0.74597119339609	3.79759408460297e-87	yes	-3.50631949519076	3.69622597825584E-06	NA		EH38D4673474-EH38E3004486,dELS	NA
chr12	13255641	13256141	EMP1	59174	Distal	uc058lkv.1	42438	no			yes	-2.6184865870585	6.89978099802135E-16	NA		EH38D4673476-EH38E3004488,dELS,CTCF-bound	8.50081090568306
chr12	13278116	13278616	EMP1	81649	Distal	uc058lkv.1	64913	yes	0.270254460058876	4.56191355660085E-09	yes	-1.16634425779097	0.000193539857791967	NA		EH38D4673491-EH38E3004502,PLS,CTCF-bound	8.90993783671825
chr12	13362200	13362700	LINC01559	24716	Distal	uc058lkx.1	13979	yes	0.50262214507067	8.29581274596821E-32	yes	-2.53453858283047	0.000138601722645542	NA		EH38D4673528-EH38E3004526,CTCF-only,CTCF-bound	8.34969317283093
chr12	13383265	13383765	LINC01559	3651	Intronic	uc058lkz.1	3651	yes	0.390327022153019	1.65661501377035E-18	yes	-5.39548279999426	8.29441631292569E-15	NA		EH38D4673544-EH38E3004538,dELS	NA
chr12	13472697	13473197	LINC01559	85779	Distal	uc058llc.1	13170	yes	0.43274292830387	6.00422099192792E-23	yes	-5.37198706813724	1.37729581788862E-14	NA		EH38D2531889-EH38E1594431,dELS	NA
chr12	13534721	13535221	LINC01559	147803	Distal	uc058lle.1	4315	no			yes	-3.67737254537468	0.00023295736869182	NA		EH38D4673590-EH38E3004567,dELS,CTCF-bound	NA
chr12	13536454	13536954	LINC01559	149536	Distal	uc058llf.1	3526	yes	0.309915996303106	1.01574844027136E-11	yes	-2.90584452866312	0.00177480018082156	NA		EH38D4673591-EH38E3004568,dELS,CTCF-bound	NA
chr12	13739632	13740132	GRIN2B	242074	Intronic	uc021qvo.1	56339	yes	0.373351406999249	6.62656296037173E-17		-0.251915839237937	1	NA		EH38D2532079-EH38E1594518,dELS,CTCF-bound	NA
chr12	13790266	13790766	GRIN2B	191440	Intronic	uc021qvo.1	106973	yes	0.251735915549242	5.68395610327215E-08		0.0438233155339821	0.301256128061042	NA		NA	NA
chr12	13915088	13915588	GRIN2B	66618	Intronic	uc001rbt.3	65024	no			yes	-1.80541217314882	0.0276867173938353	NA		NA	NA
chr12	13918836	13919336	GRIN2B	62870	Intronic	uc001rbt.3	61276	yes	0.338963810932178	6.07029895526426E-14	no	-1.00988013527561	0.115972559499267	NA		EH38D2532208-EH38E1594575,DNase-H3K4me3	NA
chr12	13941638	13942138	GRIN2B	40068	Intronic	uc001rbt.3	38474	no			yes	-2.17872732299415	4.80200017828179E-06	NA		EH38D2532222-EH38E1594583,dELS,CTCF-bound	NA
chr12	13952101	13952601	GRIN2B	29605	Intronic	uc001rbt.3	28011	no			yes	-3.46299601175274	0.0000827383932496971	NA		EH38D2532235-EH38E1594594,dELS	NA
chr12	13954229	13954729	GRIN2B	27477	Intronic	uc001rbt.3	25883	no			yes	-2.85546142731868	0.0161140579879778	NA		EH38D4673759-EH38E3004664,dELS	NA
chr12	13957608	13958108	GRIN2B	24098	Intronic	uc001rbt.3	22504	no			yes	-4.61210155945835	9.26225967488372E-09	NA		EH38D4673762-EH38E3004667,dELS,CTCF-bound	NA
chr12	13958148	13958648	GRIN2B	23558	Intronic	uc001rbt.3	21964	no			yes	-2.03004452903569	0.0161491153471852	NA		NA	NA
chr12	13959093	13959593	GRIN2B	22613	Intronic	uc001rbt.3	21019	no			yes	-3.05965282002489	0.00117691638934691	NA		EH38D4673763-EH38E3004668,dELS	NA
chr12	13960248	13960748	GRIN2B	21458	Intronic	uc001rbt.3	19864	no			yes	-2.60154130913287	0.000421970122242258	NA		NA	NA
chr12	13960788	13961288	GRIN2B	20918	Intronic	uc001rbt.3	19324	no			yes	-2.42650346416875	0.00177480018082156	NA		NA	NA
chr12	13980048	13980548	GRIN2B	1658	Exonic	uc001rbt.3	64	no			yes	-2.34603937912938	0.0314532951263758	NA		EH38D2532259-EH38E1594613,pELS	NA
chr12	13980704	13981204	GRIN2B	1002	Intronic	uc001rbt.3	590	no			yes	-4.93570255605233	1.70746390101083E-07	NA		EH38D4673776-EH38E3004681,pELS,CTCF-bound	NA
chr12	13981288	13981788	GRIN2B	418	Exonic	uc058llh.1	418	no			yes	-3.52083985990502	0.0000912780231474594	NA		EH38D4673777-EH38E3004682,PLS,CTCF-bound	NA
chr12	13981957	13982457	GRIN2B	249	Promoter	uc058llh.1	249	no			yes	-4.71395483469896	4.63966735866857E-10	NA		EH38D4673778-EH38E3004683,pELS,CTCF-bound	NA
chr12	13986018	13986518	GRIN2B	4310	Distal	uc058llh.1	4310	no			yes	-2.65830173399218	0.0257143670467556	NA		EH38D2532266-EH38E1594619,dELS	NA
1149584
