# Supplementary material for: Acquired resistance to bispecific antibodies by genetic or epigenetic inactivation of the target in multiple myeloma
Source: Research Square preprint supplement (doi:10.21203/rs.3.rs-2573797/v1), 2023-06-14
Supplement: Supplementary file 4 [file daa76c27024a8af2df4cf0db.xlsx]

## Sheet: deg
Supplementary Table 3: Significant differentially expressed genes in each MM-01-0288 subclone
Gene Symbol	Adjusted p-value	avg_log2FC	pct.1	pct.2	Up.Down	Subclone	Copy-number alteration
AAK1	5.85319e-243	0.744247	0.631	0.397	UP	cn1
ABCA5	0	0.823267	0.734	0.466	UP	cn1	+17q
ABCB9	0	-1.14181	0.236	0.749	DOWN	cn1
AC005291.2	0	0.925982	0.556	0.077	UP	cn1
AC007319.1	3.68654e-253	-0.661515	0.065	0.359	DOWN	cn1
AC008014.1	0	-1.04315	0.353	0.772	DOWN	cn1
AC008568.1	0	-1.06997	0.026	0.417	DOWN	cn1
AC012494.1	0	-1.34133	0.223	0.729	DOWN	cn1
AC016831.1	0	0.948109	0.733	0.487	UP	cn1
AC079160.1	0	-1.47697	0.072	0.688	DOWN	cn1
AC083870.1	0	-0.667077	0.054	0.406	DOWN	cn1
AC090015.1	0	-0.781028	0.131	0.504	DOWN	cn1
AC092546.1	0	-0.816995	0.142	0.546	DOWN	cn1
AC093515.1	0	-1.01748	0.017	0.431	DOWN	cn1
AC093607.1	0	-0.964801	0.144	0.559	DOWN	cn1
AC093895.1	1.9407e-246	0.769564	0.819	0.691	UP	cn1
AC106729.1	4.45567e-81	-0.788513	0.003	0.103	DOWN	cn1
AC106799.2	0	-0.857522	0.041	0.497	DOWN	cn1
ACAD11	1.20563e-270	0.700625	0.679	0.42	UP	cn1
ACOXL	0	-1.18542	0.191	0.679	DOWN	cn1
ACTB	0	-0.875588	0.185	0.655	DOWN	cn1
ACTG1	0	-1.22172	0.125	0.705	DOWN	cn1	+17q
ADAM17	4.75271e-216	0.625255	0.666	0.448	UP	cn1
ADAMTSL4-AS1	0	1.72159	0.856	0.528	UP	cn1
ADGRB3	0	-3.47166	0.484	0.955	DOWN	cn1
ADGRL3	6.65938e-277	-0.702584	0.065	0.377	DOWN	cn1
AF121898.1	0	1.12999	0.585	0.214	UP	cn1
AF165147.1	0	-1.31378	0.026	0.573	DOWN	cn1	-21
AFF1	0	0.75975	0.902	0.765	UP	cn1
AFF4	0	0.802257	0.877	0.66	UP	cn1
AGAP1	0	-1.15518	0.282	0.794	DOWN	cn1
AGFG1	0	0.741136	0.809	0.573	UP	cn1
AHCTF1	1.05706e-278	0.658699	0.817	0.643	UP	cn1
AHNAK	4.00882e-174	0.634421	0.94	0.859	UP	cn1
AKAP13	0	1.35649	0.954	0.813	UP	cn1
AKAP9	0	0.741455	0.942	0.852	UP	cn1
AL049828.1	0	-1.01089	0.155	0.59	DOWN	cn1
AL583808.1	1.23375e-215	-0.618537	0.235	0.539	DOWN	cn1
AL589693.1	0	-2.52723	0.227	0.912	DOWN	cn1
AL591501.1	0	-1.14811	0.025	0.495	DOWN	cn1
ALDH1L2	0	0.812456	0.707	0.407	UP	cn1
ALDOA	0	-0.666018	0.081	0.501	DOWN	cn1
AMBRA1	0	0.90681	0.788	0.468	UP	cn1
AMOTL1	0	0.745005	0.502	0.145	UP	cn1
ANKHD1	0	0.983587	0.948	0.784	UP	cn1
ANKRD12	0	1.07497	0.978	0.892	UP	cn1
ANXA1	0	2.08758	0.845	0.398	UP	cn1
ANXA5	0	0.832337	0.79	0.535	UP	cn1
AP001011.1	0	-1.11262	0.205	0.732	DOWN	cn1
AP3B1	0	1.09668	0.941	0.754	UP	cn1
APOL6	0	0.721741	0.588	0.261	UP	cn1
ARFGAP3	0	1.17747	0.931	0.634	UP	cn1
ARFGEF1	8.76976e-293	0.699707	0.804	0.613	UP	cn1
ARFGEF2	0	1.31157	0.948	0.647	UP	cn1
ARHGAP10	2.68637e-223	0.679171	0.487	0.244	UP	cn1
ARHGAP17	0	0.792836	0.644	0.299	UP	cn1
ARHGAP5	2.99593e-244	0.655396	0.775	0.585	UP	cn1
ARID1B	1.29549e-258	-0.618885	0.479	0.79	DOWN	cn1
ARID3B	1.04758e-276	0.717365	0.697	0.442	UP	cn1
ARID4B	0	1.04649	0.962	0.82	UP	cn1
ARL5B	1.33616e-226	0.67441	0.501	0.25	UP	cn1	-10p
ARL8B	0	0.937036	0.741	0.407	UP	cn1
ARMC8	0	0.710511	0.8	0.579	UP	cn1
ATF3	1.53542e-85	0.922768	0.564	0.475	UP	cn1
ATG13	0	0.763168	0.766	0.46	UP	cn1
ATP11B	0	0.752664	0.975	0.908	UP	cn1
ATP9B	0	0.679496	0.891	0.767	UP	cn1
ATR	5.08639e-205	0.664096	0.759	0.619	UP	cn1
ATXN1	1.12805e-290	0.612184	0.985	0.951	UP	cn1
B2M	0	-1.56756	0.985	0.999	DOWN	cn1
B4GALT3	0	-0.736201	0.062	0.513	DOWN	cn1
BABAM2	2.10512e-290	-0.650027	0.149	0.497	DOWN	cn1
BACH2	0	-0.935175	0.478	0.85	DOWN	cn1
BBOX1-AS1	0	1.06838	0.534	0.115	UP	cn1
BBX	4.40003e-189	0.665831	0.83	0.76	UP	cn1
BCAR3	0	1.22171	0.523	0.096	UP	cn1	-1p
BCAS3	1.66313e-266	-0.640908	0.311	0.657	DOWN	cn1	+17q
BCKDHB	7.83967e-278	-0.611931	0.131	0.465	DOWN	cn1
BIRC6	0	0.735146	0.946	0.865	UP	cn1
BLOC1S6	0	0.772645	0.677	0.354	UP	cn1
BRAF	0	0.647178	0.934	0.866	UP	cn1
BTAF1	0	0.891037	0.933	0.773	UP	cn1
C16orf72	8.30949e-271	0.667037	0.661	0.409	UP	cn1
C3orf67	0	0.875251	0.519	0.118	UP	cn1
CAAP1	3.24405e-228	0.617531	0.704	0.497	UP	cn1
CAB39	0	1.18892	0.795	0.451	UP	cn1
CADPS2	0	1.44636	0.949	0.701	UP	cn1
CALM1	0	-0.607073	0.37	0.739	DOWN	cn1
CALM2	0	-0.787776	0.244	0.689	DOWN	cn1
CAMK1D	1.61366e-244	-0.60878	0.388	0.715	DOWN	cn1	-10p
CAMKMT	0	-0.789556	0.207	0.565	DOWN	cn1
CAPZA1	0	0.982462	0.848	0.498	UP	cn1	-1p
CARMIL1	5.35151e-284	-0.646951	0.696	0.905	DOWN	cn1
CARS	2.04583e-290	0.662626	0.637	0.359	UP	cn1
CASC9	3.19424e-151	0.623901	0.752	0.618	UP	cn1
CCDC18	1.32389e-269	0.69151	0.498	0.221	UP	cn1	-1p
CCDC6	3.12475e-285	0.768445	0.634	0.355	UP	cn1
CCDC91	0	-1.10059	0.317	0.788	DOWN	cn1
CCL3	1.2364e-289	0.72521	0.401	0.133	UP	cn1
CCNL1	0	1.13551	0.998	0.963	UP	cn1
CCSER1	0	-0.85027	0.267	0.632	DOWN	cn1
CD44	9.64297e-69	0.776412	0.593	0.478	UP	cn1
CD48	0	-0.635312	0.144	0.526	DOWN	cn1
CD55	0	-1.04234	0.555	0.892	DOWN	cn1
CDC14A	0	0.781248	0.505	0.166	UP	cn1	-1p
CDC27	0	0.73094	0.758	0.5	UP	cn1	+17q
CDH18	0	0.768685	0.486	0.14	UP	cn1
CDK14	0	-0.671361	0.945	0.993	DOWN	cn1
CDK6	0	0.856197	0.947	0.87	UP	cn1
CDYL	1.02656e-227	0.69963	0.822	0.688	UP	cn1
CELF2	1.27876e-134	0.639603	0.746	0.643	UP	cn1	-10p
CEMIP2	6.21856e-186	0.683587	0.415	0.189	UP	cn1
CEP128	0	-1.45343	0.708	0.949	DOWN	cn1	-14q
CEP350	0	0.750687	0.872	0.728	UP	cn1
CEP95	0	0.768378	0.687	0.366	UP	cn1	+17q
CFAP47	0	-0.907965	0.043	0.454	DOWN	cn1
CFL1	0	-0.67075	0.127	0.544	DOWN	cn1
CHCHD10	0	-0.603625	0.056	0.44	DOWN	cn1
CHD1	0	0.722243	0.823	0.634	UP	cn1
CHD2	0	1.14892	0.991	0.891	UP	cn1
CHD6	5.5244e-303	0.722527	0.808	0.613	UP	cn1
CHD9	3.06893e-187	0.600223	0.768	0.631	UP	cn1
CHODL	8.75254e-293	-0.92265	0.127	0.471	DOWN	cn1	-21
CHST11	0	1.33581	0.699	0.393	UP	cn1
CLASP1	0	0.775374	0.809	0.586	UP	cn1
CLIC1	0	-1.05183	0.174	0.724	DOWN	cn1
CLIC4	4.02967e-188	0.805144	0.918	0.864	UP	cn1
CLIP1	4.73114e-227	0.652098	0.573	0.331	UP	cn1
CLPTM1L	0	-0.689808	0.519	0.835	DOWN	cn1
CLSTN2	0	-1.03079	0.087	0.5	DOWN	cn1
CLTC	0	1.1477	0.909	0.616	UP	cn1	+17q
CNOT2	5.85131e-248	0.622488	0.863	0.75	UP	cn1
CNTN4	3.90065e-184	-0.617259	0.202	0.472	DOWN	cn1
COA1	0	0.843898	0.771	0.53	UP	cn1
COG5	4.10921e-250	0.642857	0.896	0.812	UP	cn1
COL1A2	0	1.39086	0.816	0.295	UP	cn1
COPA	0	0.721225	0.902	0.753	UP	cn1
CORO1C	0	0.869964	0.675	0.341	UP	cn1
COX4I1	0	-0.73754	0.221	0.656	DOWN	cn1
COX5A	0	-0.610965	0.082	0.476	DOWN	cn1
CPEB3	0	0.882416	0.613	0.263	UP	cn1
CPNE8	4.34818e-192	0.71013	0.777	0.629	UP	cn1
CREB3L2	1.33605e-160	0.609414	0.784	0.685	UP	cn1
CREB5	0	-0.879375	0.121	0.569	DOWN	cn1
CREBBP	1.58338e-297	0.698955	0.793	0.583	UP	cn1
CROCC	0	0.875932	0.603	0.27	UP	cn1
CRY1	1.79887e-202	0.604962	0.708	0.487	UP	cn1
CST3	0	-1.19775	0.211	0.804	DOWN	cn1
CTAG2	0	-0.696999	0.064	0.496	DOWN	cn1
CUTA	0	-0.955696	0.107	0.664	DOWN	cn1
CYB5R4	0	-1.24446	0.301	0.706	DOWN	cn1
CYBA	0	-1.74736	0.587	0.971	DOWN	cn1
CYTOR	2.18945e-176	0.632588	0.973	0.958	UP	cn1
DAD1	0	-0.726541	0.153	0.604	DOWN	cn1
DCC	1.00225e-110	-0.712848	0.83	0.848	DOWN	cn1
DDX5	0	0.96912	0.983	0.905	UP	cn1	+17q
DENND1A	9.62272e-278	-0.614832	0.188	0.536	DOWN	cn1
DENND4A	0	1.18536	0.94	0.764	UP	cn1
DERL3	0	-1.15636	0.242	0.777	DOWN	cn1
DIAPH2	0	-1.06486	0.096	0.587	DOWN	cn1
DLG1	3.60122e-253	-0.631608	0.502	0.81	DOWN	cn1
DNAJC1	0	0.785547	0.998	0.989	UP	cn1	-10p
DNAJC25	3.00387e-251	0.643098	0.626	0.362	UP	cn1
DPYD	0	-1.20921	0.466	0.87	DOWN	cn1	-1p
DYRK1A	0	1.06303	0.978	0.862	UP	cn1	-21
EAF2	0	-0.82501	0.28	0.716	DOWN	cn1
ECPAS	0	0.718434	0.92	0.803	UP	cn1
EEF1A1	0	-0.958657	0.865	0.987	DOWN	cn1
EEF1B2	0	-0.977603	0.35	0.807	DOWN	cn1
EEF1G	0	-1.28561	0.198	0.795	DOWN	cn1
EHBP1	3.03209e-277	-0.610193	0.105	0.437	DOWN	cn1
EIF1	0	-0.637436	0.693	0.915	DOWN	cn1	+17q
EIF2AK3	7.31051e-296	0.745893	0.998	0.968	UP	cn1
ELL2	0	0.949848	0.998	0.989	UP	cn1
ELMO1	0	-1.05165	0.207	0.701	DOWN	cn1
ELOVL5	9.85517e-226	0.672825	0.532	0.288	UP	cn1
EML5	1.42289e-192	0.724074	0.427	0.206	UP	cn1
EMP3	0	-0.947174	0.238	0.723	DOWN	cn1
ENO1	0	-0.726119	0.186	0.614	DOWN	cn1
EP300	1.29716e-272	0.638216	0.741	0.511	UP	cn1
EPB41	0	1.09554	0.801	0.497	UP	cn1
ERC1	0	-1.66334	0.454	0.933	DOWN	cn1
ERC2	3.83219e-138	0.620663	0.795	0.685	UP	cn1
ERN1	0	1.6922	0.951	0.806	UP	cn1	+17q
ERO1B	0	1.05998	0.829	0.464	UP	cn1
EVI5	0	1.33005	0.943	0.619	UP	cn1	-1p
EWSR1	0	0.763243	0.851	0.642	UP	cn1
EYA1	0	1.51156	0.755	0.199	UP	cn1
EYS	0	-0.973871	0.463	0.804	DOWN	cn1
FAF1	0	-0.820698	0.737	0.949	DOWN	cn1
FAM171B	2.12029e-300	0.676906	0.379	0.118	UP	cn1
FAM214A	0	0.890353	0.949	0.824	UP	cn1
FAM3C	2.24454e-267	0.705511	0.793	0.611	UP	cn1
FAM91A1	1.0107e-276	0.62893	0.63	0.355	UP	cn1
FAR1	0	1.37681	0.983	0.793	UP	cn1
FARS2	0	-0.836043	0.159	0.616	DOWN	cn1
FAU	0	-1.10816	0.342	0.853	DOWN	cn1
FBH1	0	-0.641272	0.092	0.484	DOWN	cn1	-10p
FBN2	6.74685e-182	0.623972	0.4	0.182	UP	cn1
FBXL7	3.67904e-211	-0.747836	0.219	0.51	DOWN	cn1
FBXO11	1.02838e-274	0.700842	0.869	0.734	UP	cn1
FBXW11	0	0.744956	0.748	0.48	UP	cn1
FCHSD2	0	-1.6771	0.548	0.939	DOWN	cn1
FHIT	0	-1.17605	0.332	0.741	DOWN	cn1
FKBP11	0	-0.691683	0.255	0.645	DOWN	cn1
FKBP14	0	0.987157	0.677	0.28	UP	cn1
FKBP2	0	-0.874557	0.321	0.772	DOWN	cn1
FKBP5	9.59889e-254	0.891828	0.59	0.343	UP	cn1
FNIP1	0	0.884622	0.886	0.662	UP	cn1
FNIP2	0	1.70619	0.72	0.25	UP	cn1
FOS	0	0.771174	0.857	0.703	UP	cn1	-14q
FOSB	4.94119e-184	0.758734	0.832	0.818	UP	cn1
FOXJ3	8.5521e-266	0.637679	0.822	0.659	UP	cn1
FOXN3	0	-0.78165	0.522	0.83	DOWN	cn1
FOXO3	8.61241e-125	0.671066	0.721	0.607	UP	cn1
FOXP2	0	-0.962932	0.039	0.446	DOWN	cn1
FRYL	3.86869e-290	-0.615144	0.277	0.641	DOWN	cn1
FTH1	0	-0.658933	0.415	0.755	DOWN	cn1
FTL	0	-1.54639	0.361	0.908	DOWN	cn1
FTO	0	0.985839	0.862	0.606	UP	cn1
FTX	4.75601e-266	-0.629071	0.6	0.852	DOWN	cn1
FUBP3	4.62873e-303	0.666436	0.625	0.34	UP	cn1
FZD6	6.53783e-218	0.616504	0.779	0.598	UP	cn1
GAB2	1.02199e-294	0.813277	0.517	0.228	UP	cn1
GADD45A	2.50112e-253	0.857557	0.51	0.252	UP	cn1
GALNT13	1.32881e-189	-0.608523	0.084	0.339	DOWN	cn1
GALNT3	0	-0.800162	0.409	0.751	DOWN	cn1
GAPDH	0	-0.993263	0.167	0.692	DOWN	cn1
GBF1	0	1.08713	0.869	0.604	UP	cn1
GFPT1	9.68339e-270	0.731061	0.779	0.588	UP	cn1
GIGYF2	0	0.968024	0.905	0.683	UP	cn1
GLCCI1	0	-1.65502	0.138	0.754	DOWN	cn1
GLDC	0	-1.4155	0.25	0.807	DOWN	cn1
GNA13	4.46017e-289	0.60226	0.6	0.307	UP	cn1	+17q
GNB1	5.70349e-216	0.618856	0.722	0.523	UP	cn1
GNG7	0	-0.97068	0.103	0.639	DOWN	cn1
GOLGA4	0	1.66968	0.996	0.859	UP	cn1
GOLGB1	0	1.14592	0.977	0.816	UP	cn1
GOSR2	3.25946e-244	0.612203	0.581	0.322	UP	cn1	+17q
GPATCH2L	0	0.808669	0.618	0.256	UP	cn1	-14q
GPATCH8	0	1.24702	0.935	0.615	UP	cn1	+17q
GRIP1	6.47013e-157	-0.665077	0.339	0.584	DOWN	cn1
GSTP1	0	-0.834069	0.032	0.532	DOWN	cn1
H1FX	0	-1.25899	0.449	0.874	DOWN	cn1
H2AFZ	0	-0.696164	0.177	0.587	DOWN	cn1
H3F3A	0	-1.53811	0.474	0.954	DOWN	cn1
HBB	0	-1.33555	0.035	0.584	DOWN	cn1
HBP1	0	0.701249	0.657	0.373	UP	cn1
HDAC9	0	1.45726	0.859	0.569	UP	cn1
HECTD4	3.25648e-213	0.649605	0.664	0.456	UP	cn1
HELZ	0	1.07648	0.9	0.638	UP	cn1	+17q
HERC1	0	0.666291	0.874	0.73	UP	cn1
HERPUD1	0	0.917634	0.937	0.851	UP	cn1
HIF1A	2.57857e-187	0.63476	0.636	0.432	UP	cn1
HINT1	0	-0.787932	0.212	0.673	DOWN	cn1
HIST1H1C	2.59541e-296	-0.610011	0.148	0.496	DOWN	cn1
HIST1H2AC	2.72637e-241	1.26383	0.494	0.254	UP	cn1
HIST1H2BC	2.1714e-263	0.83072	0.358	0.117	UP	cn1
HIST1H2BD	3.20413e-257	0.92772	0.379	0.137	UP	cn1
HIST1H2BJ	2.95935e-155	0.70669	0.364	0.169	UP	cn1
HLA-A	9.08348e-272	-0.609118	0.827	0.95	DOWN	cn1
HLA-C	0	-1.00988	0.9	0.986	DOWN	cn1
HM13	0	0.855161	0.968	0.845	UP	cn1
HMCN1	0	1.2572	0.549	0.047	UP	cn1
HNRNPA2B1	1.815e-199	0.782693	0.924	0.91	UP	cn1
HNRNPH1	0	0.891781	0.906	0.708	UP	cn1
HSP90AA1	0	-0.953351	0.281	0.781	DOWN	cn1	-14qtel
HSP90AB1	0	-0.631705	0.667	0.91	DOWN	cn1
HSP90B1	2.29922e-297	-0.679309	0.91	0.978	DOWN	cn1
HSPA8	0	-0.965199	0.159	0.693	DOWN	cn1
IARS	0	1.00818	0.825	0.606	UP	cn1
IFNG-AS1	0	-1.51365	0.236	0.792	DOWN	cn1
IFRD1	2.15068e-90	0.795928	0.745	0.684	UP	cn1
IGF1	0	1.03264	0.861	0.73	UP	cn1
IGHG1	0	-5.31417	0.745	0.999	DOWN	cn1	-14qtel
IGHG3	0	-3.41496	0.833	1	DOWN	cn1
IGHG4	0	-3.02066	0.391	0.996	DOWN	cn1	-14qtel
IGHGP	0	-2.03243	0.414	0.977	DOWN	cn1	-14qtel
IGHV3-23	0	-1.51533	0.131	0.852	DOWN	cn1
IGKC	0	-2.4322	1	1	DOWN	cn1
IGKV4-1	0	-0.727923	0.095	0.522	DOWN	cn1
IGLC1	0	-1.97962	0.313	0.938	DOWN	cn1
IKZF3	0	0.822654	0.917	0.758	UP	cn1
IL15	0	1.06718	0.618	0.179	UP	cn1
INPP4A	0	-0.704269	0.334	0.716	DOWN	cn1
IQGAP2	0	-1.04309	0.5	0.865	DOWN	cn1
IRF1	2.77076e-220	0.760418	0.66	0.441	UP	cn1
IRF4	0	1.46505	0.906	0.673	UP	cn1
ISG20	0	-0.703925	0.17	0.596	DOWN	cn1
ITCH	0	0.939572	0.938	0.764	UP	cn1
ITGAV	0	1.01057	0.7	0.34	UP	cn1
ITGB7	0	0.767941	0.505	0.145	UP	cn1
ITM2A	0	-0.926495	0.075	0.571	DOWN	cn1
ITPR2	6.87252e-235	-0.610941	0.315	0.631	DOWN	cn1
ITSN2	0	0.944337	0.858	0.599	UP	cn1
JCHAIN	0	-1.39451	1	1	DOWN	cn1
JMJD1C	0	0.76157	0.96	0.896	UP	cn1
JTB	0	-0.669048	0.139	0.555	DOWN	cn1
KANSL1	0	0.714137	0.906	0.791	UP	cn1	+17q
KAT6B	0	1.03356	0.853	0.664	UP	cn1
KCND2	0	-1.03712	0.201	0.558	DOWN	cn1
KCNMB2-AS1	0	0.94639	0.637	0.212	UP	cn1
KCNQ5	0	-2.37781	0.188	0.873	DOWN	cn1
KDM6A	0	0.84045	0.94	0.803	UP	cn1
KHDRBS2	0	-2.24893	0.164	0.864	DOWN	cn1
KIAA1217	4.27009e-258	0.813486	0.895	0.834	UP	cn1	-10p
KLF2	0	-0.959749	0.365	0.819	DOWN	cn1
KLF3	0	-0.76266	0.068	0.45	DOWN	cn1
KLHL4	3.87804e-255	0.636503	0.247	0.053	UP	cn1
KMT2C	0	0.92592	0.995	0.964	UP	cn1
KRTCAP2	0	-0.874745	0.142	0.653	DOWN	cn1
LDHB	0	-0.755113	0.174	0.627	DOWN	cn1
LDLRAD4	0	-1.20471	0.162	0.695	DOWN	cn1
LGALS1	0	-1.12677	0.262	0.786	DOWN	cn1
LIME1	0	-0.749285	0.134	0.58	DOWN	cn1
LINC00871	6.30008e-293	-1.19735	0.087	0.415	DOWN	cn1
LINC00910	3.75969e-236	0.836764	0.75	0.567	UP	cn1	+17q
LINC01239	4.11566e-275	-0.646848	0.367	0.702	DOWN	cn1
LINC01320	1.69026e-207	-0.720911	0.418	0.68	DOWN	cn1
LINC01414	0	-0.84837	0.132	0.508	DOWN	cn1
LINC01473	0	-0.923783	0.215	0.622	DOWN	cn1
LINC01480	7.47885e-241	-0.72007	0.437	0.73	DOWN	cn1
LINC01572	8.87493e-125	-0.658518	0.097	0.286	DOWN	cn1
LINC01619	0	1.48934	0.877	0.518	UP	cn1
LINC01748	0	1.03852	0.66	0.233	UP	cn1
LINC01876	0	-0.933509	0.316	0.741	DOWN	cn1
LINC02006	6.31428e-135	-0.629973	0.046	0.23	DOWN	cn1
LINC02055	0	-1.37479	0.134	0.682	DOWN	cn1
LINC02163	0	-1.45001	0.494	0.903	DOWN	cn1
LINC02267	0	-0.954196	0.129	0.537	DOWN	cn1
LINC02542	0	-0.943763	0.055	0.476	DOWN	cn1
LMAN1	0	0.794403	0.932	0.799	UP	cn1
LMBRD1	1.45956e-187	0.600018	0.616	0.402	UP	cn1
LRBA	0	-0.754433	0.599	0.889	DOWN	cn1
LRP12	2.17956e-267	0.754088	0.604	0.332	UP	cn1
LRRC8B	1.88291e-204	0.622244	0.629	0.391	UP	cn1
LRRFIP2	0	1.11272	0.816	0.544	UP	cn1
LTBP1	2.57375e-262	-0.659108	0.031	0.318	DOWN	cn1
LTN1	0	0.787069	0.669	0.347	UP	cn1	-21
LUC7L2	0	0.86399	0.942	0.793	UP	cn1
MACO1	4.11544e-212	0.606016	0.696	0.489	UP	cn1
MACROD2	0	-1.06219	0.411	0.813	DOWN	cn1
MAGI2	0	-1.51304	0.039	0.646	DOWN	cn1
MAGI3	0	1.15108	0.821	0.544	UP	cn1	-1p
MALAT1	0	1.0231	1	1	UP	cn1
MALT1	4.95845e-215	0.696257	0.617	0.385	UP	cn1
MAN1A2	0	0.795084	0.886	0.72	UP	cn1	-1p
MAN2A1	0	0.996378	0.978	0.901	UP	cn1
MANBA	0	0.697252	0.469	0.175	UP	cn1
MANEA	0	-1.01974	0.13	0.632	DOWN	cn1
MAP1B	3.70065e-95	0.60048	0.673	0.555	UP	cn1
MAP2K1	0	1.08947	0.786	0.393	UP	cn1
MAP2K4	0	0.852234	0.814	0.563	UP	cn1
MAP3K2	1.38715e-215	0.660512	0.744	0.578	UP	cn1
MAP4	0	0.940628	0.851	0.624	UP	cn1
MAPKAPK2	0	0.748648	0.842	0.664	UP	cn1
MARCH1	0	-1.12633	0.084	0.531	DOWN	cn1
MARCH6	0	0.650838	0.943	0.848	UP	cn1
MARCH7	2.0343e-238	0.604108	0.796	0.621	UP	cn1
MBD2	1.31632e-278	0.684342	0.772	0.563	UP	cn1
MBD5	0	-0.990454	0.185	0.629	DOWN	cn1
MBNL2	0	0.916693	0.858	0.645	UP	cn1
MCL1	0	0.933576	0.978	0.939	UP	cn1
MDFIC	0	0.85791	0.787	0.591	UP	cn1
MDM2	1.5667e-263	-0.668269	0.68	0.883	DOWN	cn1
MED13	0	1.1324	0.927	0.662	UP	cn1	+17q
MED13L	0	0.754023	0.986	0.955	UP	cn1
MED27	0	0.770783	0.684	0.426	UP	cn1
MEF2A	0	0.803485	0.928	0.796	UP	cn1
MEIS2	5.41449e-278	-0.640269	0.081	0.413	DOWN	cn1
METTL15	3.4927e-258	-0.620191	0.166	0.489	DOWN	cn1
MFN1	2.54593e-291	0.692995	0.706	0.463	UP	cn1
MIA2	2.33063e-284	0.71595	0.644	0.376	UP	cn1
MIF	0	-1.19646	0.178	0.786	DOWN	cn1
MIR155HG	0	1.46959	0.453	0.151	UP	cn1	-21
MIR181A1HG	7.74933e-189	-0.657756	0.208	0.493	DOWN	cn1
MIR2052HG	1.87163e-260	-0.677323	0.261	0.602	DOWN	cn1
MIR222HG	0	1.49733	0.61	0.233	UP	cn1
MIR29B2CHG	0	0.876412	0.748	0.52	UP	cn1
MKLN1	1.90454e-299	0.696062	0.878	0.76	UP	cn1
MON2	0	0.831798	0.93	0.826	UP	cn1
MT-ATP6	0	-0.884107	0.994	0.999	DOWN	cn1
MT-CO1	0	-1.35903	0.995	1	DOWN	cn1
MT-CO2	0	-1.06807	0.997	1	DOWN	cn1
MT-CO3	0	-0.666669	0.997	1	DOWN	cn1
MT-CYB	0	-0.938949	0.991	1	DOWN	cn1
MT-ND4	0	-1.04828	0.991	1	DOWN	cn1
MT-ND5	0	-0.909129	0.991	0.999	DOWN	cn1
MTMR1	4.20315e-287	0.697963	0.727	0.492	UP	cn1
MTMR3	2.6717e-272	0.673592	0.743	0.52	UP	cn1
MTRNR2L1	0	1.01973	0.643	0.147	UP	cn1
MTRNR2L12	0	2.18311	0.993	0.989	UP	cn1
MTRNR2L8	0	1.33144	0.835	0.352	UP	cn1
MX1	0	-0.798021	0.157	0.546	DOWN	cn1	-21
MYL6	0	-0.943222	0.272	0.763	DOWN	cn1
MYO1E	2.55614e-146	0.996857	0.554	0.365	UP	cn1
MYO5A	0	1.33315	0.906	0.633	UP	cn1
MYO6	0	1.00555	0.855	0.582	UP	cn1
MZB1	0	-1.36609	0.775	0.977	DOWN	cn1
NACA	0	-0.878166	0.227	0.719	DOWN	cn1
NAMPT	1.69136e-275	1.34522	0.859	0.704	UP	cn1
NBEA	0	-2.00944	0.856	0.986	DOWN	cn1
NCAM1	0	-0.762455	0.356	0.692	DOWN	cn1
NCOR1	1.21006e-297	0.657766	0.824	0.65	UP	cn1
NDNF	1.39954e-226	-0.654272	0.43	0.726	DOWN	cn1
NDUFA13	0	-0.661059	0.143	0.549	DOWN	cn1
NDUFB11	0	-0.607411	0.081	0.465	DOWN	cn1
NDUFV2	5.87978e-256	0.638696	0.667	0.431	UP	cn1
NEAT1	0	1.865	0.996	0.931	UP	cn1
NFAT5	0	0.8326	0.584	0.278	UP	cn1
NFKB1	0	1.20371	0.844	0.634	UP	cn1
NFKBIA	0	1.30813	0.89	0.648	UP	cn1
NFKBIZ	2.06404e-253	0.871919	0.637	0.399	UP	cn1
NFXL1	0	0.784221	0.712	0.385	UP	cn1
NGLY1	2.83549e-273	0.629575	0.922	0.847	UP	cn1
NIBAN1	0	1.707	0.966	0.747	UP	cn1
NIPBL	0	0.681001	0.886	0.74	UP	cn1
NLGN1	0	-1.10669	0.034	0.394	DOWN	cn1
NME2	0	-0.902043	0.238	0.726	DOWN	cn1	+17q
NOL10	2.56824e-240	0.626271	0.796	0.643	UP	cn1
NPEPPS	0	1.23652	0.877	0.532	UP	cn1	+17q
NR2F2	4.92478e-248	-0.641488	0.225	0.545	DOWN	cn1
NR3C1	0	1.29251	0.886	0.631	UP	cn1
NRG3	0	-1.23036	0.79	0.943	DOWN	cn1
NRXN1	6.96465e-152	-0.665807	0.3	0.539	DOWN	cn1
NSD2	0	0.683871	1	0.999	UP	cn1
NTNG1	0	0.707473	0.282	0.042	UP	cn1	-1p
NUCB2	0	-0.700005	0.522	0.82	DOWN	cn1
NUFIP2	9.10688e-212	0.778612	0.775	0.635	UP	cn1
NUGGC	0	0.813854	0.712	0.402	UP	cn1
NUP214	9.58881e-278	0.644516	0.738	0.511	UP	cn1
NUP54	2.19231e-263	0.663165	0.741	0.537	UP	cn1
OAZ1	0	-0.75256	0.158	0.616	DOWN	cn1
OGT	0	0.969398	0.933	0.74	UP	cn1
OSBP	6.14599e-295	0.652635	0.668	0.396	UP	cn1
OSBPL9	0	0.693807	0.809	0.621	UP	cn1
OXR1	2.2117e-196	-0.617485	0.575	0.803	DOWN	cn1
PAIP2B	1.19567e-277	0.818252	0.697	0.435	UP	cn1
PAM	0	1.41994	0.952	0.697	UP	cn1
PARP14	3.50001e-225	0.641884	0.652	0.408	UP	cn1
PASD1	0	0.780056	0.504	0.09	UP	cn1
PCNX1	0	1.38671	0.767	0.392	UP	cn1	-14q
PCSK1N	0	-1.30914	0.079	0.732	DOWN	cn1
PDE4B	4.76228e-209	0.701461	0.964	0.919	UP	cn1
PDIA2	3.61454e-218	-0.659838	0.347	0.622	DOWN	cn1
PDIA5	4.18175e-272	0.677783	0.624	0.356	UP	cn1
PECAM1	1.84842e-284	-0.600947	0.172	0.514	DOWN	cn1	+17q
PEG10	1.24548e-15	0.619493	0.228	0.173	UP	cn1
PELI1	2.84738e-211	0.906507	0.99	0.98	UP	cn1
PELI2	1.87538e-76	0.702457	0.495	0.368	UP	cn1
PFN1	0	-0.859433	0.125	0.63	DOWN	cn1
PGM3	0	1.32974	0.89	0.462	UP	cn1
PHF20L1	3.27786e-206	0.61669	0.667	0.469	UP	cn1
PIAS1	3.41401e-291	0.655394	0.872	0.719	UP	cn1
PIK3C2A	0	0.756463	0.844	0.643	UP	cn1
PKP4	0	-0.824279	0.184	0.592	DOWN	cn1
PLCG2	0	1.94511	1	0.949	UP	cn1
PLCL2	1.01699e-291	0.840045	0.576	0.292	UP	cn1
PLP2	0	-0.696663	0.127	0.55	DOWN	cn1
PMM2	0	0.759143	0.869	0.686	UP	cn1
PNPLA8	1.63304e-223	0.627915	0.729	0.516	UP	cn1
PPIA	0	-0.930865	0.282	0.772	DOWN	cn1
PPIB	0	-1.22766	0.481	0.91	DOWN	cn1
PPIP5K2	0	0.81471	0.775	0.55	UP	cn1
PPP1R12A	0	0.920347	0.911	0.755	UP	cn1
PPP1R1C	0	0.961993	0.455	0.145	UP	cn1
PPP1R2	0	-0.831574	0.436	0.808	DOWN	cn1
PPP2R5E	0	1.28779	0.807	0.379	UP	cn1	-14q
PPP3CA	3.54647e-285	0.807201	0.93	0.872	UP	cn1
PPP3CC	9.43534e-261	0.667173	0.888	0.802	UP	cn1
PPP3R1	0	0.708415	0.893	0.752	UP	cn1
PPP6R3	0	0.72954	0.892	0.77	UP	cn1
PRDM2	0	0.750864	0.859	0.689	UP	cn1
PRKCB	0	-0.819004	0.532	0.839	DOWN	cn1
PRKG1	3.19133e-251	-0.931764	0.14	0.447	DOWN	cn1
PSMA7	0	-0.610471	0.099	0.482	DOWN	cn1
PSMD12	0	0.733926	0.787	0.544	UP	cn1	+17q
PSME4	0	0.706619	0.886	0.755	UP	cn1
PTBP2	2.68645e-246	0.641867	0.786	0.602	UP	cn1	-1p
PTCHD1-AS	1.57321e-28	-0.702423	0.726	0.685	DOWN	cn1
PTEN	1.45811e-228	0.632834	0.881	0.789	UP	cn1
PTGS2	1.73506e-121	0.731599	0.214	0.076	UP	cn1
PTMA	0	-1.09403	0.83	0.987	DOWN	cn1
PTP4A3	0	-0.911068	0.151	0.57	DOWN	cn1
PTPRD	4.23716e-284	-0.818089	0.108	0.437	DOWN	cn1
PTPRG	0	-1.11077	0.851	0.962	DOWN	cn1
RAB11FIP1	1.31397e-287	-0.722732	0.465	0.787	DOWN	cn1
RAB1A	0	0.75085	0.886	0.724	UP	cn1
RAB27A	1.84063e-261	0.750404	0.661	0.416	UP	cn1
RAB2A	3.58481e-228	0.604658	0.843	0.732	UP	cn1
RAB3GAP2	0	1.15725	0.918	0.659	UP	cn1
RAB7A	0	1.33728	0.926	0.67	UP	cn1
RABGAP1L	0	-0.720372	0.883	0.971	DOWN	cn1
RACK1	0	-0.851883	0.203	0.687	DOWN	cn1
RALA	0	0.980751	0.765	0.491	UP	cn1
RALGPS2	1.62343e-220	0.717853	0.966	0.939	UP	cn1
RALYL	6.46195e-264	-1.40401	0.159	0.475	DOWN	cn1
RAP1A	2.81928e-201	0.602	0.493	0.254	UP	cn1	-1p
RAPGEF2	0	-1.29703	0.894	0.989	DOWN	cn1
RAPGEF4	0	1.13549	0.62	0.237	UP	cn1
RAPGEF5	0	-0.894998	0.492	0.828	DOWN	cn1
RASGRP3	2.16311e-243	0.876118	0.611	0.363	UP	cn1
RB1CC1	0	1.0152	0.943	0.78	UP	cn1
RBFOX1	1.2513e-167	-0.623732	0.109	0.347	DOWN	cn1
RBM25	0	0.744291	0.804	0.54	UP	cn1	-14q
RBM26	4.69847e-206	0.617924	0.729	0.545	UP	cn1
RC3H1	0	0.890222	0.935	0.788	UP	cn1
RFX3	1.90263e-203	-0.625678	0.404	0.696	DOWN	cn1
RGL1	0	1.60565	0.878	0.394	UP	cn1
RGS6	7.03675e-203	-0.603048	0.117	0.388	DOWN	cn1	-14q
RICTOR	0	1.01459	0.941	0.764	UP	cn1
RIMS1	1.34673e-232	0.679841	0.439	0.188	UP	cn1
RIMS2	0	-2.83235	0.242	0.821	DOWN	cn1
RIPK1	0	0.874976	0.833	0.533	UP	cn1
RNF216	0	0.910134	0.656	0.265	UP	cn1
RNGTT	4.87881e-275	0.634748	0.903	0.824	UP	cn1
ROCK1	1.93084e-300	0.645706	0.862	0.708	UP	cn1
RPL10	0	-1.85143	0.666	0.984	DOWN	cn1
RPL10A	0	-1.36329	0.237	0.86	DOWN	cn1
RPL11	0	-1.52574	0.286	0.894	DOWN	cn1
RPL12	0	-1.01712	0.215	0.747	DOWN	cn1
RPL13	0	-1.74707	0.544	0.971	DOWN	cn1
RPL13A	0	-1.43076	0.462	0.932	DOWN	cn1
RPL14	0	-0.931162	0.205	0.717	DOWN	cn1
RPL15	0	-1.46826	0.247	0.876	DOWN	cn1
RPL17	0	-1.09639	0.362	0.848	DOWN	cn1
RPL18	0	-1.54484	0.252	0.893	DOWN	cn1
RPL18A	0	-1.48232	0.238	0.875	DOWN	cn1
RPL19	0	-1.64541	0.229	0.896	DOWN	cn1
RPL21	0	-1.0025	0.277	0.786	DOWN	cn1
RPL22	0	-0.681681	0.23	0.636	DOWN	cn1
RPL23	0	-1.18109	0.204	0.796	DOWN	cn1
RPL23A	0	-1.46583	0.281	0.893	DOWN	cn1
RPL24	0	-1.31789	0.268	0.864	DOWN	cn1
RPL26	0	-1.17719	0.271	0.831	DOWN	cn1
RPL27	0	-0.8001	0.264	0.722	DOWN	cn1	+17q
RPL27A	0	-1.20021	0.298	0.851	DOWN	cn1
RPL28	0	-1.7334	0.422	0.951	DOWN	cn1
RPL29	0	-1.4714	0.188	0.862	DOWN	cn1
RPL3	0	-1.54246	0.26	0.88	DOWN	cn1
RPL30	0	-1.18354	0.274	0.836	DOWN	cn1
RPL31	0	-0.825034	0.201	0.685	DOWN	cn1
RPL32	0	-1.27409	0.32	0.88	DOWN	cn1
RPL34	0	-0.828784	0.319	0.752	DOWN	cn1
RPL35	0	-1.00459	0.369	0.839	DOWN	cn1
RPL35A	0	-0.964757	0.273	0.78	DOWN	cn1
RPL36	0	-0.81955	0.191	0.665	DOWN	cn1
RPL36A	0	-1.21542	0.224	0.811	DOWN	cn1
RPL37	0	-0.977074	0.343	0.824	DOWN	cn1
RPL37A	0	-1.19669	0.422	0.895	DOWN	cn1
RPL39	0	-1.07043	0.239	0.79	DOWN	cn1
RPL4	0	-0.811496	0.328	0.748	DOWN	cn1
RPL41	0	-1.30447	0.45	0.922	DOWN	cn1
RPL6	0	-1.1179	0.326	0.828	DOWN	cn1
RPL7	0	-1.21386	0.23	0.812	DOWN	cn1
RPL7A	0	-1.31791	0.229	0.834	DOWN	cn1
RPL8	0	-1.47986	0.247	0.872	DOWN	cn1
RPL9	0	-1.01528	0.229	0.759	DOWN	cn1
RPLP0	0	-1.77675	0.47	0.952	DOWN	cn1
RPLP1	0	-1.7569	0.878	0.996	DOWN	cn1
RPLP2	0	-1.21007	0.394	0.897	DOWN	cn1
RPRD1B	6.12718e-298	0.625781	0.7	0.429	UP	cn1
RPS11	0	-1.66332	0.413	0.944	DOWN	cn1
RPS12	0	-1.31447	0.252	0.848	DOWN	cn1
RPS13	0	-1.37382	0.191	0.841	DOWN	cn1
RPS14	0	-1.64293	0.287	0.915	DOWN	cn1
RPS15	0	-1.36348	0.239	0.851	DOWN	cn1
RPS15A	0	-1.23054	0.297	0.865	DOWN	cn1
RPS16	0	-1.48722	0.28	0.887	DOWN	cn1
RPS17	0	-1.38281	0.295	0.879	DOWN	cn1
RPS18	0	-2.38797	0.6	0.985	DOWN	cn1
RPS19	0	-1.55326	0.508	0.949	DOWN	cn1
RPS2	0	-1.11398	0.134	0.711	DOWN	cn1
RPS20	0	-0.985804	0.412	0.853	DOWN	cn1
RPS21	0	-1.19462	0.225	0.814	DOWN	cn1
RPS23	0	-1.39121	0.217	0.847	DOWN	cn1
RPS24	0	-1.43227	0.324	0.902	DOWN	cn1
RPS25	0	-0.922199	0.327	0.788	DOWN	cn1
RPS26	0	-0.727808	0.23	0.666	DOWN	cn1
RPS27	0	-1.31815	0.372	0.903	DOWN	cn1
RPS27A	0	-1.61574	0.39	0.941	DOWN	cn1
RPS28	0	-1.28647	0.243	0.84	DOWN	cn1
RPS29	0	-0.782207	0.396	0.81	DOWN	cn1
RPS3	0	-1.44082	0.324	0.893	DOWN	cn1
RPS3A	0	-1.62264	0.374	0.929	DOWN	cn1
RPS4X	0	-1.59065	0.221	0.878	DOWN	cn1
RPS5	0	-1.48022	0.239	0.862	DOWN	cn1
RPS6	0	-1.43429	0.434	0.924	DOWN	cn1
RPS6KA3	0	1.07833	0.668	0.335	UP	cn1
RPS6KA6	0	0.707075	0.478	0.187	UP	cn1
RPS7	0	-1.16354	0.255	0.825	DOWN	cn1
RPS8	0	-1.72646	0.379	0.94	DOWN	cn1
RPS9	0	-1.20056	0.344	0.863	DOWN	cn1
RPSA	0	-1.19277	0.27	0.835	DOWN	cn1
RRBP1	0	1.06375	0.905	0.665	UP	cn1
RSRC1	8.79947e-250	-0.673951	0.485	0.767	DOWN	cn1
RTN4	0	0.845845	0.921	0.818	UP	cn1
RUNX1	0	1.76142	0.931	0.775	UP	cn1	-21
RUNX1T1	0	-0.937884	0.028	0.384	DOWN	cn1
RYBP	2.07889e-209	0.647744	0.703	0.507	UP	cn1
S100A10	9.54744e-269	-0.674868	0.202	0.548	DOWN	cn1
S100A6	0	-1.21269	0.088	0.699	DOWN	cn1
SAMD12	0	-0.998427	0.332	0.781	DOWN	cn1
SBF2	0	-0.738559	0.255	0.639	DOWN	cn1
SCAPER	0	-1.02519	0.409	0.784	DOWN	cn1
SCARB2	0	-0.72018	0.357	0.716	DOWN	cn1
SCFD1	0	1.12527	0.999	0.97	UP	cn1
SCFD2	0	-0.845476	0.307	0.689	DOWN	cn1
SCLT1	2.96498e-228	-0.632933	0.281	0.598	DOWN	cn1
SDF2L1	0	-0.780539	0.249	0.67	DOWN	cn1
SEC23A	1.47933e-232	0.612634	0.607	0.356	UP	cn1
SEC24D	0	1.5041	0.994	0.863	UP	cn1
SEC63	0	0.708559	0.868	0.719	UP	cn1
SEL1L	0	1.36878	0.933	0.697	UP	cn1	-14q
SEMA3A	0	-0.913215	0.076	0.502	DOWN	cn1
SEMA6D	3.4833e-227	-0.765038	0.295	0.604	DOWN	cn1
SENP5	0	0.83575	0.812	0.542	UP	cn1
SERF2	0	-0.854788	0.225	0.707	DOWN	cn1
SESN2	0	1.29159	0.472	0.048	UP	cn1
SETBP1	0	1.15327	0.981	0.875	UP	cn1
SF3B1	1.52648e-273	0.61825	0.805	0.637	UP	cn1
SGMS2	3.50324e-293	0.700417	0.407	0.139	UP	cn1
SLAMF1	0	1.76065	0.836	0.478	UP	cn1
SLC10A7	0	1.14202	0.853	0.573	UP	cn1
SLC16A7	3.7665e-199	0.751459	0.749	0.619	UP	cn1
SLC30A7	0	1.37472	0.869	0.427	UP	cn1	-1p
SLC38A1	0	0.942235	0.893	0.689	UP	cn1
SLC39A8	4.65868e-164	0.60161	0.647	0.468	UP	cn1
SLC41A2	8.95613e-241	0.640288	0.536	0.272	UP	cn1
SLC44A1	0	-1.7392	0.316	0.896	DOWN	cn1
SLC49A4	1.30886e-199	0.635109	0.593	0.36	UP	cn1
SLC7A11	0	0.851284	0.373	0.086	UP	cn1
SLC7A5	0	0.881909	0.57	0.283	UP	cn1
SLC9A8	4.97557e-261	0.604451	0.62	0.349	UP	cn1
SLC9A9	0	-0.940271	0.058	0.532	DOWN	cn1
SLC9C1	0	-0.637849	0.028	0.361	DOWN	cn1
SMCHD1	0	-1.1525	0.891	0.985	DOWN	cn1
SMG1	0	0.765018	0.841	0.642	UP	cn1
SMURF2	0	0.821379	0.568	0.232	UP	cn1	+17q
SMYD3	0	-1.13869	0.478	0.851	DOWN	cn1
SND1	0	1.07615	1	0.987	UP	cn1
SNIP1	0	0.760053	0.668	0.308	UP	cn1
SPAG9	0	1.21842	0.903	0.582	UP	cn1	+17q
SPCS1	0	-1.2896	0.252	0.843	DOWN	cn1
SPCS2	0	-0.647544	0.748	0.934	DOWN	cn1
SPPL2A	1.67295e-258	0.69009	0.679	0.431	UP	cn1
SPRED1	0	0.834619	0.458	0.107	UP	cn1
SPRED2	0	0.841475	0.628	0.302	UP	cn1
SQSTM1	4.09507e-113	0.762035	0.739	0.641	UP	cn1
SREK1	0	0.896963	0.906	0.71	UP	cn1
SRPK2	0	0.995539	0.919	0.747	UP	cn1
SRSF11	0	0.776679	0.949	0.83	UP	cn1
SRSF4	0	0.891082	0.939	0.783	UP	cn1
SSR4	0	-2.0007	0.882	0.992	DOWN	cn1
ST7	0	0.809921	0.569	0.235	UP	cn1
STAG1	0	0.903533	0.999	0.976	UP	cn1
STAT3	0	0.815485	0.727	0.458	UP	cn1	+17q
STK10	0	0.755453	0.597	0.288	UP	cn1
STPG2	2.1289e-295	-0.816924	0.624	0.854	DOWN	cn1
STS	4.28865e-212	0.711622	0.596	0.349	UP	cn1
STT3B	0	0.693661	0.93	0.832	UP	cn1
SUCO	0	0.829895	0.923	0.778	UP	cn1
SYT1	0	-1.07224	0.322	0.729	DOWN	cn1
TAGLN2	0	-0.663302	0.174	0.552	DOWN	cn1
TAX1BP1	0	0.668023	0.912	0.795	UP	cn1
TBC1D1	9.60995e-273	-0.601846	0.079	0.395	DOWN	cn1
TBC1D15	0	0.756719	0.868	0.675	UP	cn1
TBC1D23	0	0.845045	0.873	0.641	UP	cn1
TBC1D5	0	-1.03363	0.204	0.658	DOWN	cn1
TEAD1	0	-0.785345	0.082	0.5	DOWN	cn1
TENT2	0	0.697159	0.815	0.621	UP	cn1
TES	2.92301e-135	0.610573	0.654	0.503	UP	cn1
TEX14	0	1.56666	0.899	0.646	UP	cn1	+17q
TFDP2	0	0.910307	0.849	0.66	UP	cn1
TIMP1	0	-1.0835	0.254	0.786	DOWN	cn1
TJP1	0	0.806428	0.562	0.204	UP	cn1
TLK2	0	0.682445	0.685	0.391	UP	cn1	+17q
TM9SF3	5.11243e-254	0.623051	0.855	0.734	UP	cn1
TMBIM6	7.32459e-301	-0.637679	0.454	0.77	DOWN	cn1
TMED5	0	0.754648	0.769	0.484	UP	cn1	-1p
TMEM205	0	-0.798374	0.109	0.573	DOWN	cn1
TMEM39A	0	0.847938	0.869	0.636	UP	cn1
TMSB10	0	-1.03219	0.412	0.866	DOWN	cn1
TMTC1	5.07259e-148	0.748288	0.601	0.424	UP	cn1
TNFRSF10B	1.96231e-122	0.641157	0.312	0.147	UP	cn1
TNFRSF17	0	-1.5545	0.136	0.842	DOWN	cn1
TNKS	0	1.04705	0.89	0.637	UP	cn1
TNKS2	0	0.713807	0.769	0.538	UP	cn1
TNRC6A	6.20891e-273	0.620455	0.863	0.741	UP	cn1
TOGARAM1	1.37018e-277	0.674056	0.784	0.577	UP	cn1
TOP1	0	1.80234	0.982	0.836	UP	cn1
TOR1AIP1	9.63148e-255	0.635097	0.615	0.351	UP	cn1
TPT1	0	-0.904405	0.378	0.817	DOWN	cn1
TRAM1	0	-0.799717	0.84	0.97	DOWN	cn1
TRIB1	1.97351e-286	0.778292	0.729	0.496	UP	cn1
TRIM2	0	1.17458	0.688	0.231	UP	cn1
TRPM7	0	0.920889	0.792	0.511	UP	cn1
TSPYL2	0	0.603782	0.423	0.115	UP	cn1
TTC17	8.10835e-260	0.653396	0.864	0.746	UP	cn1
TUBA1B	0	-0.83158	0.138	0.579	DOWN	cn1
TUBB	0	-0.843089	0.109	0.534	DOWN	cn1
TUBB6	0	0.778988	0.539	0.189	UP	cn1
TXN	0	-0.857117	0.221	0.712	DOWN	cn1
UAP1	3.76809e-112	0.656425	0.949	0.95	UP	cn1
UBA5	1.73696e-288	0.667886	0.838	0.684	UP	cn1
UBA52	0	-1.06085	0.337	0.832	DOWN	cn1
UBB	0	-0.742899	0.138	0.588	DOWN	cn1
UBC	0	-1.05024	0.582	0.932	DOWN	cn1
UBE2E2	0	0.956027	0.955	0.851	UP	cn1
UBE2H	0	0.822166	0.995	0.969	UP	cn1
UBE2O	0	0.753423	0.634	0.318	UP	cn1	+17q
UBE3A	2.686e-266	0.603711	0.866	0.747	UP	cn1
UBR3	0	-0.718915	0.262	0.635	DOWN	cn1
UBR5	1.06452e-287	0.626635	0.937	0.846	UP	cn1
UBXN4	0	0.687041	0.891	0.761	UP	cn1
USP14	0	0.769734	0.887	0.709	UP	cn1
USP24	1.64058e-248	0.650627	0.727	0.514	UP	cn1
USP3	0	0.757462	0.929	0.831	UP	cn1
USP9X	3.28641e-265	0.620495	0.865	0.74	UP	cn1
UTRN	0	-0.860842	0.32	0.724	DOWN	cn1
VAV3	9.75218e-281	0.918227	0.673	0.398	UP	cn1	-1p
VMP1	0	1.3157	0.962	0.725	UP	cn1	+17q
VOPP1	0	0.811675	0.933	0.877	UP	cn1
VPS13A	0	0.67201	0.936	0.841	UP	cn1
VPS13B	0	-0.727721	0.551	0.848	DOWN	cn1
VPS13D	2.18573e-188	0.609962	0.634	0.441	UP	cn1
WAC	1.52287e-303	0.637564	0.923	0.833	UP	cn1	-10p
WARS	7.94275e-284	0.888854	0.712	0.456	UP	cn1
WASHC4	8.50896e-268	0.640849	0.608	0.339	UP	cn1
WDFY3	9.46827e-166	0.620319	0.601	0.405	UP	cn1
WDR26	1.31483e-295	0.664567	0.82	0.643	UP	cn1
WRN	0	0.704483	0.882	0.737	UP	cn1
XBP1	0	-1.16921	0.619	0.936	DOWN	cn1
XPO4	0	0.989284	0.811	0.461	UP	cn1
XRN1	0	0.949	0.998	0.957	UP	cn1
YME1L1	0	0.988813	0.946	0.737	UP	cn1	-10p
YTHDC1	0	0.680901	0.897	0.743	UP	cn1
ZBP1	0	-1.14933	0.317	0.783	DOWN	cn1
ZBTB20	0	-2.51759	0.888	0.998	DOWN	cn1
ZBTB43	0	0.828688	0.773	0.459	UP	cn1
ZEB1	1.34453e-134	0.60466	0.805	0.75	UP	cn1	-10p
ZFAND3	0	1.56865	0.999	0.94	UP	cn1
ZFC3H1	0	0.950381	0.872	0.644	UP	cn1
ZFPM2-AS1	0	1.01316	0.498	0.145	UP	cn1
ZNF292	0	1.05202	0.976	0.853	UP	cn1
ZNF644	0	0.853334	0.933	0.762	UP	cn1
ZNF804A	0	-1.647	0.355	0.884	DOWN	cn1
ZRANB2	0	0.699271	0.868	0.707	UP	cn1
AC008825.1	0	0.683692	0.33	0.033	UP	cn2
AC079160.1	2.17278e-96	-1.04792	0.143	0.558	DOWN	cn2
AC092957.1	1.91862e-97	0.620432	0.297	0.077	UP	cn2
AC114316.1	3.94365e-103	0.861183	0.626	0.3	UP	cn2
ACTG1	1.74704e-48	0.6205	0.752	0.551	UP	cn2	+17q
ADGRB3	6.44676e-168	-2.4248	0.63	0.85	DOWN	cn2
AF165147.1	3.85977e-59	-0.810748	0.149	0.454	DOWN	cn2	-21
AKT3	1.23844e-66	0.746114	0.622	0.366	UP	cn2
AL591501.1	6.84838e-54	-0.67376	0.095	0.394	DOWN	cn2
ALCAM	1.28052e-53	-0.884522	0.584	0.8	DOWN	cn2
ANKRD28	5.78902e-78	-0.692721	0.976	0.994	DOWN	cn2
ATP13A3	1.31658e-55	-0.648123	0.37	0.652	DOWN	cn2
BCL2L11	2.59881e-56	-0.625507	0.484	0.767	DOWN	cn2
BMPR2	1.8456e-74	-0.65033	0.083	0.433	DOWN	cn2
C1orf21	2.60445e-48	-0.611579	0.433	0.687	DOWN	cn2
CAB39	1.20111e-36	-0.682534	0.316	0.548	DOWN	cn2
CADPS2	4.6604e-37	-0.726232	0.575	0.773	DOWN	cn2
CAMK1D	7.11424e-84	-0.833954	0.3	0.653	DOWN	cn2	-10p
CCDC192	5.46813e-166	0.741639	0.471	0.123	UP	cn2
CD44	5.89038e-86	0.801191	0.789	0.49	UP	cn2
CD48	3.62104e-68	0.674914	0.675	0.418	UP	cn2
CDH12	4.61892e-248	0.95595	0.497	0.1	UP	cn2
CDH18	5.32959e-120	0.641289	0.572	0.206	UP	cn2
CDK6	1.89984e-44	-0.655953	0.772	0.896	DOWN	cn2
CEACAM21	1.47504e-36	-0.633532	0.484	0.687	DOWN	cn2
CELF2	3.59778e-41	-0.603358	0.446	0.681	DOWN	cn2	-10p
CEP128	9.37361e-105	0.927602	0.976	0.885	UP	cn2	-14q
CHD2	8.7288e-80	-0.818676	0.8	0.922	DOWN	cn2
CLSTN2	3.31747e-50	-0.718672	0.132	0.413	DOWN	cn2
CPEB4	2.64573e-84	-0.751726	0.798	0.944	DOWN	cn2
CREB3L2	8.74769e-50	-0.605202	0.471	0.723	DOWN	cn2
CTNNA2	9.2924e-154	1.20236	0.423	0.113	UP	cn2
CYB5R4	2.71602e-26	-0.640084	0.433	0.616	DOWN	cn2
CYTOR	7.46183e-90	-0.837531	0.891	0.965	DOWN	cn2
DCC	4.2182e-36	-0.623967	0.684	0.852	DOWN	cn2
DENND1B	1.56513e-78	-0.709638	0.937	0.98	DOWN	cn2
DLEU1	1.02228e-212	1.12098	0.809	0.313	UP	cn2
DLGAP1	2.56805e-35	0.76886	0.48	0.302	UP	cn2
DMD	1.7262e-98	0.712118	0.443	0.154	UP	cn2
DNAJC1	3.214e-113	-0.827746	0.962	0.993	DOWN	cn2	-10p
EIF1	4.16928e-151	0.785244	0.967	0.854	UP	cn2	+17q
EIF2AK3	7.36611e-166	-1.229	0.866	0.981	DOWN	cn2
ELL2	1.98377e-111	-0.93157	0.956	0.993	DOWN	cn2
EMP3	7.12176e-118	0.934597	0.831	0.591	UP	cn2
EPHA6	4.97497e-115	0.94134	0.962	0.801	UP	cn2
ERN1	3.04935e-19	-0.627382	0.736	0.847	DOWN	cn2	+17q
ETV6	1.0086e-154	-1.17735	0.448	0.862	DOWN	cn2
FAM214A	2.76517e-149	-1.22598	0.533	0.873	DOWN	cn2
FAR1	4.4803e-91	-0.969534	0.616	0.852	DOWN	cn2
FBXL7	4.104e-33	0.638108	0.615	0.428	UP	cn2
FBXW7	2.15871e-108	-0.698943	0.985	0.998	DOWN	cn2
FLNA	5.65828e-80	0.690347	0.781	0.549	UP	cn2
FNDC3B	1.62013e-185	-1.01435	0.997	0.999	DOWN	cn2
FNIP1	3.14042e-49	-0.602409	0.48	0.731	DOWN	cn2
FNIP2	2.12899e-43	-0.919341	0.132	0.379	DOWN	cn2
FOXO3	6.67764e-72	-0.88171	0.318	0.653	DOWN	cn2
FSTL5	0	0.787025	0.464	0.06	UP	cn2
GBF1	5.06695e-50	-0.658429	0.431	0.683	DOWN	cn2
GLCCI1	9.23274e-99	-1.17615	0.237	0.622	DOWN	cn2
GLDC	1.01755e-109	-1.06313	0.283	0.691	DOWN	cn2
GMDS	5.11413e-47	-0.642643	0.608	0.784	DOWN	cn2
GOLGA4	4.34031e-21	-0.627398	0.83	0.896	DOWN	cn2
GPRIN3	0	0.82259	0.396	0.039	UP	cn2
H3F3B	6.87611e-194	1.13369	0.98	0.844	UP	cn2	+17q
HBB	2.40293e-120	0.79637	0.758	0.431	UP	cn2
HDAC9	2.89938e-49	-0.987965	0.411	0.653	DOWN	cn2
HELZ	9.8586e-46	-0.630963	0.496	0.714	DOWN	cn2	+17q
HERC1	4.65913e-74	-0.723638	0.499	0.78	DOWN	cn2
HIST1H2AC	1.57719e-09	-0.669192	0.206	0.319	DOWN	cn2
HLA-A	2.95522e-159	0.906347	0.995	0.916	UP	cn2
HLA-B	1.38084e-117	0.668998	0.999	0.988	UP	cn2
IGF1	4.41101e-36	-0.720003	0.586	0.772	DOWN	cn2
IGHG1	7.23339e-41	-0.874256	0.999	0.933	DOWN	cn2	-14qtel
IGHG3	5.5778e-47	-0.774283	1	0.956	DOWN	cn2
IGHGP	5.87761e-42	-0.649675	0.873	0.837	DOWN	cn2	-14qtel
IGHV3-23	6.11582e-64	-0.804723	0.455	0.686	DOWN	cn2
IGKC	1.24227e-180	0.855505	1	1	UP	cn2
IL6ST	6.16278e-90	-0.81021	0.412	0.755	DOWN	cn2
IRF4	3.66926e-104	-1.21843	0.392	0.749	DOWN	cn2
ITGA4	1.12302e-70	-0.786303	0.569	0.81	DOWN	cn2
ITM2C	4.38202e-105	0.787205	0.909	0.747	UP	cn2
JCHAIN	3.16598e-155	0.693548	1	1	UP	cn2
KCNB2	1.34778e-155	0.712162	0.312	0.059	UP	cn2
KCNMB2-AS1	3.71719e-75	0.625548	0.618	0.3	UP	cn2
KCNQ5	2.86742e-43	-0.879869	0.558	0.712	DOWN	cn2
KIAA1217	4.36642e-48	-0.627319	0.649	0.86	DOWN	cn2	-10p
KIF1B	2.90622e-61	-0.649056	0.259	0.571	DOWN	cn2
KMT2C	2.41403e-66	-0.623616	0.915	0.975	DOWN	cn2
LINC-PINT	4.88975e-81	-0.758218	0.846	0.967	DOWN	cn2
LINC00351	1.52718e-189	0.780516	0.369	0.068	UP	cn2
LINC00922	2.49697e-121	1.08115	0.679	0.336	UP	cn2
LINC02109	0	1.42792	0.53	0.028	UP	cn2
LINC02315	1.82788e-131	0.792957	0.549	0.188	UP	cn2
LRMP	1.22033e-180	-1.42747	0.397	0.843	DOWN	cn2
MACC1	5.99907e-63	0.698821	0.499	0.247	UP	cn2
MAGI2	6.56271e-109	-1.16347	0.086	0.519	DOWN	cn2
MAGI3	5.09512e-33	-0.707312	0.419	0.623	DOWN	cn2	-1p
MAN1A1	9.03183e-79	-0.82596	0.615	0.864	DOWN	cn2
MAN2A1	4.60583e-52	-0.681575	0.816	0.926	DOWN	cn2
MAP3K5	3.75513e-56	-0.629852	0.554	0.795	DOWN	cn2
MAP4K3	1.29102e-106	-0.84245	0.823	0.956	DOWN	cn2
MARCH1	4.31704e-52	-0.786216	0.149	0.436	DOWN	cn2
MARK3	2.5999e-73	-0.652389	0.361	0.7	DOWN	cn2	-14qtel
MBNL1	3.43987e-75	-0.756315	0.831	0.948	DOWN	cn2
MCC	1.88337e-73	-0.854637	0.324	0.653	DOWN	cn2
MED13L	3.48974e-101	-0.77951	0.843	0.969	DOWN	cn2
MEF2C	7.19932e-64	-0.689373	0.695	0.883	DOWN	cn2
MIR181A1HG	9.95615e-90	-1.10195	0.058	0.443	DOWN	cn2
MIR222HG	1.5489e-58	-0.950643	0.049	0.341	DOWN	cn2
MIR548XHG	0	1.35953	0.793	0.208	UP	cn2	-21
MRPS27	5.19932e-85	-0.817211	0.283	0.643	DOWN	cn2
MSR1	9.67183e-166	0.959999	0.503	0.146	UP	cn2
MTRNR2L12	3.687e-94	-1.33465	0.987	0.99	DOWN	cn2
MTRNR2L8	2.18258e-35	-0.60904	0.264	0.483	DOWN	cn2
MYO1E	1.36782e-58	-0.994612	0.122	0.428	DOWN	cn2
NBEA	2.05638e-161	-1.44007	0.873	0.959	DOWN	cn2
NCAM1	1.16915e-51	-0.627778	0.338	0.624	DOWN	cn2
NDNF	7.60285e-37	-0.611514	0.457	0.664	DOWN	cn2
NEAT1	9.30502e-141	-1.59276	0.822	0.954	DOWN	cn2
NPAS3	2.7773e-67	0.857424	0.594	0.331	UP	cn2
NR4A2	4.96502e-41	0.740073	0.62	0.436	UP	cn2
NRG1	3.18273e-31	0.697563	0.643	0.462	UP	cn2
NRG3	2.65592e-46	-0.646581	0.786	0.912	DOWN	cn2
OTUD5	6.55258e-56	0.675037	0.589	0.374	UP	cn2
OXR1	3.68182e-95	-0.931404	0.43	0.765	DOWN	cn2
PARPBP	6.85949e-50	-0.638247	0.131	0.405	DOWN	cn2
PBX1	3.79949e-53	0.627357	0.444	0.222	UP	cn2
PBXIP1	2.35087e-110	0.871773	0.657	0.341	UP	cn2
PCDH9	1.35473e-36	-0.648338	0.434	0.663	DOWN	cn2
PCNX2	5.05282e-57	0.617889	0.566	0.327	UP	cn2
PELI1	3.66128e-128	-1.28907	0.912	0.986	DOWN	cn2
PELI2	7.99752e-30	-0.718843	0.197	0.41	DOWN	cn2
PGM3	5.48029e-37	-0.627978	0.362	0.579	DOWN	cn2
PLA2G4A	5.92809e-73	-0.771362	0.268	0.618	DOWN	cn2
PLCG2	5.47008e-56	-1.04415	0.937	0.963	DOWN	cn2
PLD5	8.1853e-47	0.667761	0.321	0.14	UP	cn2
PRDM1	7.6515e-71	-0.6896	0.277	0.622	DOWN	cn2
PRKCB	4.78922e-80	-0.826187	0.476	0.779	DOWN	cn2
PRKD3	1.42103e-50	-0.634509	0.638	0.815	DOWN	cn2
PRKG1	3.23968e-30	-0.603637	0.161	0.383	DOWN	cn2
PSME4	1.38738e-66	-0.685817	0.538	0.801	DOWN	cn2
PTCHD1-AS	4.57374e-156	-1.9312	0.232	0.721	DOWN	cn2
RAB7A	6.68148e-32	-0.621355	0.575	0.742	DOWN	cn2
RABGAP1L	2.59369e-79	0.63919	0.981	0.947	UP	cn2
RAP1B	2.16801e-88	-0.719249	0.784	0.942	DOWN	cn2
RAPGEF4	1.76905e-34	-0.646088	0.122	0.343	DOWN	cn2
RAPGEF5	2.73804e-75	-0.882369	0.507	0.758	DOWN	cn2
RB1CC1	1.06314e-68	-0.761963	0.613	0.831	DOWN	cn2
RBFOX1	1.66106e-51	-0.685746	0.037	0.302	DOWN	cn2
RC3H1	3.18934e-53	-0.633897	0.634	0.835	DOWN	cn2
RICTOR	1.94366e-74	-0.825067	0.571	0.821	DOWN	cn2
RIMS2	3.91118e-158	-2.28113	0.255	0.701	DOWN	cn2
RTN4	1.07194e-60	-0.706352	0.643	0.854	DOWN	cn2
RUNX1	1.0632e-80	-1.27735	0.569	0.827	DOWN	cn2	-21
RUNX1T1	1.1836e-32	-0.631315	0.096	0.307	DOWN	cn2
S100A10	4.61852e-52	0.929786	0.654	0.452	UP	cn2
S100A6	1.35498e-139	1.20618	0.827	0.532	UP	cn2
SEMA6D	4.89007e-49	-0.775912	0.266	0.543	DOWN	cn2
SETBP1	9.35938e-214	-1.56761	0.511	0.923	DOWN	cn2
SFMBT2	6.40302e-118	-0.898719	0.124	0.576	DOWN	cn2	-10p
SH3RF3	5.64994e-53	-0.629247	0.1	0.39	DOWN	cn2
SKAP1	2.23007e-134	1.14354	0.832	0.519	UP	cn2	+17q
SLAMF1	2.65716e-18	-0.794202	0.426	0.574	DOWN	cn2
SLC10A7	2.75625e-35	-0.629769	0.433	0.654	DOWN	cn2
SLC38A1	1.32953e-44	-0.617374	0.531	0.751	DOWN	cn2
SLC44A1	3.24685e-90	-0.98372	0.519	0.766	DOWN	cn2
SQSTM1	1.27206e-12	-0.614035	0.589	0.669	DOWN	cn2
SRPK2	3.78245e-35	-0.600818	0.621	0.799	DOWN	cn2
ST3GAL6	3.45086e-108	-0.931982	0.686	0.902	DOWN	cn2
STRBP	6.91571e-63	-0.695586	0.569	0.821	DOWN	cn2
TAGLN2	8.12275e-50	0.697147	0.654	0.448	UP	cn2
TANC2	1.30583e-73	0.716032	0.638	0.361	UP	cn2	+17q
TASOR2	2.30193e-96	-0.806177	0.384	0.751	DOWN	cn2	-10p
TBC1D15	3.36234e-57	-0.607014	0.462	0.737	DOWN	cn2
TBC1D9	4.46129e-65	-0.755592	0.256	0.581	DOWN	cn2
TBL1X	5.89515e-60	-0.632559	0.306	0.63	DOWN	cn2
TEX41	1.11953e-145	0.917147	0.991	0.927	UP	cn2
TIMP1	3.59061e-143	0.867435	0.915	0.64	UP	cn2
TIPARP	8.02129e-66	-0.777207	0.465	0.769	DOWN	cn2
TMBIM6	1.08213e-74	0.620801	0.859	0.683	UP	cn2
TMED10	1.07388e-93	0.702464	0.777	0.524	UP	cn2	-14q
TNS3	1.22082e-77	-0.856885	0.367	0.695	DOWN	cn2
TOP1	5.93157e-25	-0.72487	0.775	0.877	DOWN	cn2
TP53INP1	1.15096e-52	-0.603245	0.33	0.613	DOWN	cn2
TPO	1.43228e-107	0.776852	0.572	0.25	UP	cn2
TTLL7	4.53348e-90	-0.893258	0.732	0.916	DOWN	cn2
UCK2	2.07939e-47	-0.603119	0.268	0.531	DOWN	cn2
UPF2	6.10292e-58	-0.602577	0.293	0.595	DOWN	cn2	-10p
USP3	2.02418e-67	-0.66422	0.656	0.866	DOWN	cn2
VPS37B	3.26268e-82	-0.659972	0.81	0.948	DOWN	cn2
WDR43	1.82144e-62	-0.602865	0.365	0.666	DOWN	cn2
XRN1	4.44782e-158	-1.05664	0.855	0.973	DOWN	cn2
ZBTB20	1.25306e-46	-0.963777	0.99	0.97	DOWN	cn2
ZNF331	1.97392e-67	0.968721	0.56	0.312	UP	cn2
ZNF804A	1.12412e-70	-1.07025	0.558	0.764	DOWN	cn2
AC008568.1	2.7519e-35	-0.611209	0.125	0.334	DOWN	cn3
AC084816.1	0	1.69447	0.656	0.157	UP	cn3
ADGRB3	1.58234e-18	-0.744968	0.924	0.833	DOWN	cn3
AF279873.3	5.10346e-256	0.880828	0.593	0.154	UP	cn3
AFF1	6.52777e-61	-0.660492	0.622	0.81	DOWN	cn3
AL035401.1	1.10862e-87	0.607814	0.403	0.151	UP	cn3
AL591501.1	2.14789e-67	-0.731206	0.093	0.397	DOWN	cn3
B4GALT1	5.73722e-51	0.614436	0.667	0.441	UP	cn3
CD55	3.60264e-93	0.747663	0.94	0.8	UP	cn3
CD5L	0	0.629984	0.303	0.029	UP	cn3
CFAP47	1.84324e-67	0.665988	0.592	0.337	UP	cn3
CLSTN2	3.09235e-43	-0.617585	0.176	0.413	DOWN	cn3
CPEB4	1.38314e-108	-0.819778	0.817	0.945	DOWN	cn3
CYB5R4	7.84058e-86	0.846377	0.809	0.593	UP	cn3
DGKI	1.13036e-171	0.814909	0.511	0.16	UP	cn3
DLEU1	8.4057e-236	1.09903	0.795	0.309	UP	cn3
DLGAP1	1.92364e-91	0.911084	0.585	0.294	UP	cn3
DMD	1.48573e-298	1.11379	0.598	0.141	UP	cn3
DNAH14	1.59563e-73	0.640933	0.832	0.63	UP	cn3
EIF2AK3	1.90924e-71	-0.667484	0.926	0.978	DOWN	cn3
ELL2	1.00562e-67	-0.66847	0.983	0.992	DOWN	cn3
EPHA6	2.38745e-94	0.764378	0.959	0.8	UP	cn3
ERN1	1.15057e-52	-0.925986	0.733	0.849	DOWN	cn3	+17q
FAM214A	1.38816e-72	-0.749206	0.715	0.864	DOWN	cn3
FBXL7	8.64936e-68	0.715338	0.673	0.422	UP	cn3
FCHSD2	2.06252e-69	0.610652	0.965	0.834	UP	cn3
FNDC3B	1.48457e-95	-0.606847	1	0.999	DOWN	cn3
FNIP2	5.44135e-33	-0.827969	0.187	0.378	DOWN	cn3
FUT8	1.79694e-88	0.705397	0.888	0.707	UP	cn3	-14q
GBF1	2.36573e-80	-0.786326	0.408	0.687	DOWN	cn3
HDAC9	1.06603e-16	-0.647366	0.539	0.647	DOWN	cn3
HELZ	3.99981e-81	-0.758382	0.447	0.719	DOWN	cn3	+17q
HIST1H2AC	7.46822e-16	-0.61102	0.185	0.321	DOWN	cn3
HYDIN	0	1.29521	0.583	0.113	UP	cn3
IGF1	2.0393e-74	-0.873583	0.544	0.777	DOWN	cn3
IL6ST	1.56198e-58	-0.622679	0.542	0.749	DOWN	cn3
IRF4	8.42707e-37	-0.82081	0.602	0.739	DOWN	cn3
KCNMB2-AS1	3.01842e-161	0.868339	0.709	0.291	UP	cn3
KHDRBS2	3.49915e-106	0.909036	0.928	0.676	UP	cn3
LINC00871	2.57063e-39	-0.759519	0.126	0.348	DOWN	cn3
LINC01320	3.19654e-94	-0.705768	0.236	0.641	DOWN	cn3
LINC02315	2.39783e-145	0.702528	0.54	0.185	UP	cn3
LINC02842	0	0.673934	0.268	0.02	UP	cn3
LRRC8C	3.28356e-51	0.672715	0.693	0.491	UP	cn3
LRRFIP1	6.26439e-88	0.954825	0.727	0.487	UP	cn3
MAGI2	3.95852e-91	-0.93432	0.159	0.519	DOWN	cn3
MARCH1	2.06513e-37	-0.607647	0.21	0.434	DOWN	cn3
MIR181A1HG	2.10071e-70	-0.791074	0.122	0.443	DOWN	cn3
MIR548XHG	4.5504e-249	1.06329	0.692	0.209	UP	cn3	-21
MLF1	2.07408e-55	0.628562	0.685	0.464	UP	cn3
MOB1B	2.75675e-65	0.641207	0.495	0.256	UP	cn3
MTRNR2L12	2.52416e-74	-1.24792	0.989	0.99	DOWN	cn3
MTRNR2L8	1.12828e-33	-0.607253	0.302	0.483	DOWN	cn3
MYO3B	0	1.14733	0.512	0.086	UP	cn3
NEAT1	5.08884e-173	-1.76664	0.839	0.954	DOWN	cn3
NES	7.55331e-142	0.654672	0.569	0.22	UP	cn3
NRXN1	9.99991e-81	0.765725	0.73	0.463	UP	cn3
NUMB	2.47367e-63	0.615781	0.716	0.497	UP	cn3	-14q
PELI1	6.77824e-33	-0.659022	0.973	0.983	DOWN	cn3
PELI2	1.77768e-18	-0.615319	0.263	0.408	DOWN	cn3
PLCG2	2.11317e-05	-0.704053	0.962	0.962	DOWN	cn3
PLD5	3.62174e-95	0.610741	0.385	0.134	UP	cn3
PPP1R12B	1.29657e-66	0.851487	0.842	0.683	UP	cn3
PRKD1	1.68213e-224	0.601829	0.305	0.044	UP	cn3
PTPRG	1.2943e-130	0.885525	0.978	0.932	UP	cn3
RAB11FIP1	1.25243e-114	0.880459	0.895	0.695	UP	cn3
RABGAP1L	5.18867e-226	0.985859	0.997	0.946	UP	cn3
RAPGEF2	2.57296e-117	0.771877	0.997	0.963	UP	cn3
RUNX1	1.93054e-19	-0.718149	0.728	0.819	DOWN	cn3	-21
SLAMF1	4.4121e-72	-1.13368	0.296	0.584	DOWN	cn3
SNX9	3.43949e-87	0.80559	0.619	0.338	UP	cn3
SQSTM1	2.51869e-38	-0.836809	0.522	0.674	DOWN	cn3
TEX14	1.09367e-58	-1.09374	0.511	0.721	DOWN	cn3	+17q
TEX41	8.16747e-141	0.814227	0.987	0.927	UP	cn3
TOP1	3.00693e-21	-0.742736	0.829	0.874	DOWN	cn3
TPM4	2.12083e-65	0.642038	0.834	0.661	UP	cn3
TSHR	9.29434e-69	0.637199	0.542	0.29	UP	cn3	-14q
XRN1	2.4876e-72	-0.635214	0.927	0.97	DOWN	cn3
ZFPM2-AS1	5.36405e-155	0.77471	0.595	0.208	UP	cn3
AC106729.1	0	1.48045	0.298	0.04	UP	cn4
ANXA1	1.14524e-20	-0.795594	0.43	0.522	DOWN	cn4
CYB5R4	1.4447e-145	0.879155	0.76	0.58	UP	cn4
DCC	8.08172e-138	-0.726979	0.671	0.873	DOWN	cn4
ERN1	5.48764e-102	-0.845941	0.728	0.861	DOWN	cn4	+17q
IGHG1	3.05768e-161	0.647069	0.997	0.926	UP	cn4	-14qtel
IGHG3	5.49067e-236	0.72848	0.998	0.952	UP	cn4
IGHGP	1.47931e-170	0.601136	0.976	0.815	UP	cn4	-14qtel
IGHV3-23	4.16668e-162	0.652907	0.875	0.64	UP	cn4
IGLC1	9.39045e-22	0.753873	0.853	0.772	UP	cn4
IGLC2	1.59451e-15	0.948366	0.16	0.096	UP	cn4
IGLC3	0.000171107	1.31202	0.138	0.098	UP	cn4
LINC00871	8.09276e-145	1.03633	0.543	0.299	UP	cn4
LINC02006	0	1.08804	0.489	0.133	UP	cn4
MTRNR2L12	2.28803e-161	-0.766379	0.968	0.994	DOWN	cn4
NEAT1	4.89557e-101	-0.67037	0.891	0.957	DOWN	cn4
PCDH9	3.13924e-103	0.838008	0.762	0.632	UP	cn4
PRKD3	4.16068e-194	-0.688033	0.557	0.848	DOWN	cn4
RALYL	0	1.62217	0.678	0.349	UP	cn4
RAPGEF2	3.57681e-192	0.77352	0.986	0.962	UP	cn4
RUNX1T1	3.20313e-170	0.807342	0.526	0.257	UP	cn4
SCAPER	1.01923e-95	0.748525	0.789	0.675	UP	cn4
STAT4	2.6966e-54	0.603297	0.68	0.571	UP	cn4
ABCB9	0	0.763949	0.82	0.431	UP	cn5
AC005291.2	0	-0.738997	0.018	0.367	DOWN	cn5
AC007319.1	0	0.667285	0.456	0.123	UP	cn5
AC008568.1	0	0.992257	0.536	0.112	UP	cn5
AC079160.1	0	1.03833	0.807	0.273	UP	cn5
AC092546.1	0	0.795441	0.66	0.239	UP	cn5
AC093515.1	0	1.08136	0.587	0.078	UP	cn5
AC106799.2	0	0.661006	0.596	0.179	UP	cn5
ACOXL	0	0.865351	0.771	0.352	UP	cn5
ADAMTSL4-AS1	0	-1.37428	0.483	0.731	DOWN	cn5
ADGRB3	0	1.64476	0.995	0.687	UP	cn5
AF121898.1	8.31605e-275	-0.899621	0.182	0.425	DOWN	cn5
AF165147.1	0	0.93806	0.692	0.191	UP	cn5	-21
AGAP1	0	0.824615	0.865	0.477	UP	cn5
AGK	0	0.61748	0.776	0.479	UP	cn5
AKAP13	0	-0.995772	0.807	0.887	DOWN	cn5
AL049828.1	0	0.652381	0.658	0.313	UP	cn5
AL589693.1	0	1.00489	0.95	0.542	UP	cn5
AL591501.1	0	0.878055	0.614	0.15	UP	cn5
ANKHD1	6.35809e-283	-0.663081	0.796	0.852	DOWN	cn5
ANKRD12	0	-0.777545	0.891	0.935	DOWN	cn5
ANXA1	0	-2.17192	0.302	0.709	DOWN	cn5
AP001011.1	0	0.794341	0.809	0.401	UP	cn5
AP3B1	0	-0.794309	0.752	0.847	DOWN	cn5
ARFGAP3	0	-0.880257	0.61	0.802	DOWN	cn5
ARFGEF2	0	-0.838892	0.661	0.78	DOWN	cn5
ARID4B	1.67761e-301	-0.717244	0.829	0.88	DOWN	cn5
ATF3	1.4638e-35	-0.641966	0.477	0.516	DOWN	cn5
ATXN1	0	-0.670396	0.942	0.976	DOWN	cn5
B2M	0	0.61703	1	0.991	UP	cn5
BBOX1-AS1	0	-0.925811	0.033	0.397	DOWN	cn5
BCAR3	0	-0.853334	0.062	0.336	DOWN	cn5	-1p
C3orf67	0	-0.694288	0.062	0.368	DOWN	cn5
CAB39	1.09809e-164	-0.783343	0.473	0.597	DOWN	cn5
CADPS2	1.5264e-298	-1.0108	0.723	0.801	DOWN	cn5
CALCRL	0	0.751543	0.631	0.294	UP	cn5
CAPZA1	0	-0.743144	0.461	0.704	DOWN	cn5	-1p
CCNL1	0	-0.812253	0.965	0.979	DOWN	cn5
CD44	8.23287e-152	-0.972404	0.433	0.577	DOWN	cn5
CDC14A	0	-0.688213	0.104	0.391	DOWN	cn5	-1p
CDH18	0	-0.835234	0.049	0.397	DOWN	cn5
CHD2	1.09419e-170	-0.611752	0.913	0.918	DOWN	cn5
CHST11	3.59215e-163	-0.949864	0.394	0.54	DOWN	cn5
CLSTN2	0	1.11092	0.652	0.152	UP	cn5
CLTC	0	-0.767657	0.614	0.759	DOWN	cn5	+17q
COL1A2	0	-1.36313	0.156	0.682	DOWN	cn5
CROCC	1.71641e-183	-0.606645	0.254	0.447	DOWN	cn5
CYBA	0	0.988387	0.988	0.768	UP	cn5
DCC	0	0.920372	0.924	0.765	UP	cn5
DDX5	0	-0.676139	0.9	0.948	DOWN	cn5	+17q
DENND4A	2.2047e-243	-0.847455	0.788	0.826	DOWN	cn5
DIAPH2	0	0.75395	0.676	0.262	UP	cn5
DLEU1	0	-1.00304	0.151	0.521	DOWN	cn5
DPYD	0	0.860549	0.924	0.621	UP	cn5	-1p
DYRK1A	0	-0.794838	0.86	0.92	DOWN	cn5	-21
EAF2	0	0.626171	0.782	0.44	UP	cn5
EEF1B2	0	0.622693	0.861	0.532	UP	cn5
EEF1G	0	0.692876	0.846	0.455	UP	cn5
ELMO1	0	0.764306	0.783	0.381	UP	cn5
EPB41	5.38287e-119	-0.625256	0.528	0.615	DOWN	cn5
ERC1	0	0.941017	0.966	0.669	UP	cn5
ERC2	9.63733e-187	-0.674672	0.659	0.764	DOWN	cn5
ERN1	1.00116e-152	-0.974529	0.845	0.838	DOWN	cn5	+17q
ERO1B	0	-0.79763	0.431	0.674	DOWN	cn5
EVI5	0	-1.21044	0.553	0.841	DOWN	cn5	-1p
EYA1	0	-1.29313	0.119	0.547	DOWN	cn5
FAM126A	0	0.60176	0.788	0.475	UP	cn5
FAR1	7.93161e-278	-0.826105	0.824	0.856	DOWN	cn5
FHIT	0	0.783425	0.804	0.481	UP	cn5
FKBP14	3.17291e-244	-0.652664	0.262	0.49	DOWN	cn5
FNIP2	7.20527e-216	-1.11697	0.271	0.459	DOWN	cn5
FOS	0	-0.746544	0.675	0.805	DOWN	cn5	-14q
FOXN3	0	0.642234	0.892	0.62	UP	cn5
FOXP2	0	0.83862	0.549	0.148	UP	cn5
FTL	0	0.954618	0.946	0.605	UP	cn5
FTO	9.91892e-222	-0.665242	0.609	0.728	DOWN	cn5
FZD6	1.1765e-254	-0.628186	0.554	0.728	DOWN	cn5
GLCCI1	0	0.935468	0.839	0.372	UP	cn5
GLDC	0	0.772402	0.885	0.461	UP	cn5
GOLGA4	0	-1.20825	0.859	0.925	DOWN	cn5
GOLGB1	0	-0.948186	0.794	0.915	DOWN	cn5
GPATCH2L	0	-0.628562	0.211	0.476	DOWN	cn5	-14q
GPATCH8	0	-0.911919	0.596	0.788	DOWN	cn5	+17q
H3F3A	0	0.668059	0.971	0.704	UP	cn5
HDAC9	7.0271e-188	-1.01684	0.592	0.688	DOWN	cn5
HIST1H2AC	1.35516e-65	-0.816318	0.262	0.362	DOWN	cn5
HIST1H2BD	1.55809e-92	-0.603616	0.133	0.258	DOWN	cn5
HM13	0	-0.640588	0.841	0.91	DOWN	cn5
HMCN1	0	-0.852109	0.021	0.316	DOWN	cn5
IFNG-AS1	0	1.02127	0.88	0.435	UP	cn5
IGHG1	0	1.1502	1	0.875	UP	cn5	-14qtel
IGHG3	0	0.945386	1	0.918	UP	cn5
IGHG4	0	0.988673	0.999	0.698	UP	cn5	-14qtel
IGHGP	0	0.746581	0.991	0.691	UP	cn5	-14qtel
IGKC	0	0.640192	1	1	UP	cn5
IL15	0	-0.809997	0.141	0.43	DOWN	cn5
IRF4	9.2706e-121	-0.857036	0.713	0.747	DOWN	cn5
ITM2A	0	0.866763	0.691	0.214	UP	cn5
KAT6B	2.99525e-258	-0.774899	0.652	0.768	DOWN	cn5
KCNMB2-AS1	0	-1.1073	0.113	0.514	DOWN	cn5
KCNQ5	0	1.22162	0.944	0.471	UP	cn5
KHDRBS2	0	0.689723	0.894	0.495	UP	cn5
LDLRAD4	0	0.808062	0.772	0.361	UP	cn5
LINC01320	0	0.65581	0.789	0.447	UP	cn5
LINC01414	0	0.601778	0.575	0.261	UP	cn5
LINC01619	0	-1.12292	0.502	0.708	DOWN	cn5
LINC01748	0	-0.88945	0.163	0.509	DOWN	cn5
LINC02055	0	1.04518	0.789	0.312	UP	cn5
LINC02315	0	-0.783583	0.042	0.368	DOWN	cn5
LINC02542	0	0.602912	0.552	0.197	UP	cn5
LRRFIP2	1.55889e-199	-0.7572	0.547	0.673	DOWN	cn5
LUC7L2	0	-0.629903	0.791	0.867	DOWN	cn5
MACROD2	0	0.859499	0.884	0.548	UP	cn5
MAGI2	0	1.13164	0.795	0.207	UP	cn5
MAGI3	1.37666e-167	-0.773562	0.55	0.672	DOWN	cn5	-1p
MANEA	0	0.887755	0.735	0.288	UP	cn5
MAP2K1	1.24346e-272	-0.760393	0.381	0.596	DOWN	cn5
MAP2K4	1.63031e-204	-0.610899	0.556	0.692	DOWN	cn5
MAP4	3.56205e-241	-0.68858	0.615	0.743	DOWN	cn5
MARCH1	0	1.19681	0.7	0.15	UP	cn5
MBNL2	1.144e-191	-0.654267	0.638	0.756	DOWN	cn5
MCL1	1.16825e-273	-0.690303	0.943	0.955	DOWN	cn5
MDM2	0	0.663995	0.924	0.744	UP	cn5
MED13	6.03653e-298	-0.734293	0.666	0.787	DOWN	cn5	+17q
METTL7A	0	0.65969	0.68	0.303	UP	cn5
MIF	0	0.679644	0.839	0.439	UP	cn5
MIR155HG	1.53482e-244	-1.15506	0.114	0.334	DOWN	cn5	-21
MIR2052HG	0	0.611614	0.688	0.352	UP	cn5
MIR222HG	9.43241e-168	-0.971374	0.236	0.414	DOWN	cn5
MIR29B2CHG	3.52276e-164	-0.605692	0.508	0.643	DOWN	cn5
MIR548XHG	0	-1.07252	0.048	0.424	DOWN	cn5	-21
MT-CO1	0	0.766449	1	0.997	UP	cn5
MT-CO2	0	0.758298	1	0.998	UP	cn5
MT-ND4	0	0.723802	1	0.995	UP	cn5
MT-ND5	0	0.819432	0.999	0.995	UP	cn5
MTRNR2L1	3.00343e-260	-0.602995	0.152	0.383	DOWN	cn5
MTRNR2L12	1.02649e-222	-1.45085	0.996	0.985	DOWN	cn5
MTRNR2L8	1.66135e-264	-0.818403	0.373	0.567	DOWN	cn5
MYO1E	1.36024e-38	-0.6621	0.378	0.445	DOWN	cn5
MYO5A	0	-0.94796	0.622	0.777	DOWN	cn5
MYO6	1.40245e-163	-0.64379	0.59	0.706	DOWN	cn5
MZB1	0	0.657243	0.991	0.865	UP	cn5
NAMPT	7.46937e-209	-1.08859	0.678	0.804	DOWN	cn5
NBEA	0	0.978046	0.999	0.911	UP	cn5
NCAM1	0	0.641304	0.778	0.444	UP	cn5
NEAT1	1.05617e-37	-1.03279	0.966	0.928	DOWN	cn5
NEB	0	-0.759488	0.302	0.627	DOWN	cn5
NFKB1	3.10272e-116	-0.825111	0.663	0.708	DOWN	cn5
NFKBIA	0	-1.09766	0.614	0.798	DOWN	cn5
NIBAN1	0	-1.45286	0.713	0.887	DOWN	cn5
NPEPPS	7.34358e-282	-0.803566	0.534	0.697	DOWN	cn5	+17q
NR3C1	3.00087e-240	-0.861308	0.642	0.745	DOWN	cn5
NRG1	5.06476e-229	-0.758304	0.348	0.592	DOWN	cn5
OXR1	0	0.710831	0.882	0.616	UP	cn5
PAM	0	-0.953538	0.721	0.798	DOWN	cn5
PASD1	0	-0.661837	0.021	0.358	DOWN	cn5
PCDH9	4.08995e-149	-0.664739	0.598	0.702	DOWN	cn5
PCNX1	0	-1.0277	0.366	0.599	DOWN	cn5	-14q
PCSK1N	0	0.685532	0.784	0.364	UP	cn5
PGM3	0	-0.892813	0.458	0.674	DOWN	cn5
PIEZO2	0	0.612254	0.407	0.056	UP	cn5
PLCG2	0	-1.51439	0.945	0.977	DOWN	cn5
PPP1R12A	8.04454e-241	-0.639784	0.759	0.827	DOWN	cn5
PPP1R1C	1.09103e-172	-0.659382	0.132	0.309	DOWN	cn5
PPP2R5E	1.09916e-286	-0.838239	0.375	0.59	DOWN	cn5	-14q
PRKCB	0	0.682709	0.91	0.621	UP	cn5
PRKD3	0	0.643824	0.904	0.71	UP	cn5
PRKG1	5.60338e-281	0.68771	0.517	0.23	UP	cn5
PTBP2	8.88338e-292	-0.636513	0.556	0.736	DOWN	cn5	-1p
PTCHD1-AS	1.08808e-160	0.776646	0.753	0.64	UP	cn5
PTMA	0	0.6194	0.993	0.905	UP	cn5
PTP4A3	0	0.805338	0.666	0.273	UP	cn5
RAB11FIP2	9.46657e-299	0.64508	0.553	0.277	UP	cn5
RAB3GAP2	1.38614e-240	-0.737274	0.682	0.761	DOWN	cn5
RAB7A	8.74682e-294	-0.863984	0.684	0.782	DOWN	cn5
RALA	1.43349e-145	-0.65975	0.497	0.618	DOWN	cn5
RALGPS2	1.41653e-188	-0.611623	0.933	0.957	DOWN	cn5
RAPGEF4	5.62516e-134	-0.704691	0.253	0.407	DOWN	cn5
RAPGEF5	0	0.614717	0.886	0.609	UP	cn5
RASGRP3	3.57245e-188	-0.709034	0.325	0.52	DOWN	cn5
RB1CC1	4.98038e-190	-0.611578	0.802	0.837	DOWN	cn5
RBM25	0	-0.651131	0.495	0.711	DOWN	cn5	-14q
RC3H1	4.81438e-220	-0.602395	0.804	0.844	DOWN	cn5
RGL1	0	-1.24071	0.35	0.673	DOWN	cn5
RIMS2	0	1.89001	0.931	0.432	UP	cn5
RIPK1	1.77807e-285	-0.633025	0.511	0.701	DOWN	cn5
RPL10	0	0.762124	0.994	0.819	UP	cn5
RPL10A	0	0.719322	0.904	0.514	UP	cn5
RPL11	0	0.71951	0.928	0.566	UP	cn5
RPL13	0	0.758219	0.986	0.748	UP	cn5
RPL13A	0	0.697071	0.96	0.677	UP	cn5
RPL15	0	0.616326	0.909	0.537	UP	cn5
RPL18	0	0.662556	0.927	0.549	UP	cn5
RPL18A	0	0.729186	0.919	0.522	UP	cn5
RPL19	0	0.727942	0.933	0.536	UP	cn5
RPL23	0	0.619965	0.843	0.463	UP	cn5
RPL23A	0	0.712864	0.928	0.561	UP	cn5
RPL24	0	0.66869	0.903	0.535	UP	cn5
RPL27A	0	0.619271	0.886	0.548	UP	cn5
RPL28	0	0.847967	0.974	0.671	UP	cn5
RPL29	0	0.718485	0.906	0.492	UP	cn5
RPL3	0	0.628227	0.911	0.549	UP	cn5
RPL32	0	0.635265	0.917	0.573	UP	cn5
RPL36A	0	0.696559	0.863	0.476	UP	cn5
RPL37A	0	0.622142	0.927	0.633	UP	cn5
RPL7	0	0.62227	0.853	0.489	UP	cn5
RPL7A	0	0.66042	0.874	0.501	UP	cn5
RPL8	0	0.706602	0.912	0.53	UP	cn5
RPLP0	0	0.967122	0.98	0.69	UP	cn5
RPLP1	0	0.820052	0.999	0.936	UP	cn5
RPLP2	0	0.663653	0.933	0.618	UP	cn5
RPS11	0	0.729891	0.966	0.664	UP	cn5
RPS12	0	0.722036	0.894	0.513	UP	cn5
RPS13	0	0.693837	0.883	0.484	UP	cn5
RPS14	0	0.667893	0.945	0.58	UP	cn5
RPS15	0	0.637039	0.888	0.518	UP	cn5
RPS16	0	0.689246	0.922	0.558	UP	cn5
RPS17	0	0.689559	0.917	0.558	UP	cn5
RPS18	0	1.01065	0.997	0.786	UP	cn5
RPS19	0	0.857338	0.973	0.712	UP	cn5
RPS23	0	0.659448	0.887	0.502	UP	cn5
RPS24	0	0.782707	0.943	0.582	UP	cn5
RPS27A	0	0.715589	0.964	0.651	UP	cn5
RPS28	0	0.657166	0.883	0.508	UP	cn5
RPS3	0	0.714387	0.929	0.581	UP	cn5
RPS3A	0	0.791278	0.961	0.628	UP	cn5
RPS4X	0	0.699243	0.916	0.522	UP	cn5
RPS5	0	0.75439	0.908	0.514	UP	cn5
RPS6	0	0.689222	0.953	0.658	UP	cn5
RPS6KA3	6.96931e-247	-0.800651	0.307	0.525	DOWN	cn5
RPS8	0	0.876219	0.969	0.639	UP	cn5
RPSA	0	0.677829	0.882	0.515	UP	cn5
RRBP1	0	-0.783414	0.647	0.799	DOWN	cn5
RUNX1	1.24003e-204	-1.18528	0.802	0.824	DOWN	cn5	-21
SCFD1	0	-0.751523	0.974	0.98	DOWN	cn5
SCFD2	0	0.699312	0.775	0.421	UP	cn5
SEC24D	0	-1.17038	0.851	0.938	DOWN	cn5
SEL1L	0	-0.892859	0.708	0.801	DOWN	cn5	-14q
SEMA3A	0	0.6138	0.577	0.222	UP	cn5
SEMA6D	0	0.857077	0.728	0.334	UP	cn5
SESN2	0	-0.804053	0.04	0.262	DOWN	cn5
SETBP1	1.36757e-249	-0.79965	0.901	0.901	DOWN	cn5
SHANK2	0	0.638118	0.446	0.084	UP	cn5
SLAMF1	2.52892e-124	-1.09788	0.526	0.604	DOWN	cn5
SLC10A7	1.25074e-137	-0.676359	0.608	0.676	DOWN	cn5
SLC30A7	0	-1.10318	0.365	0.701	DOWN	cn5	-1p
SLC44A1	0	1.1743	0.968	0.545	UP	cn5
SMCHD1	0	0.8892	0.995	0.929	UP	cn5
SMYD3	0	0.763447	0.91	0.612	UP	cn5
SND1	0	-0.671099	0.988	0.992	DOWN	cn5
SPAG9	0	-0.865301	0.576	0.744	DOWN	cn5	+17q
SPRED1	0	-0.644292	0.062	0.322	DOWN	cn5
SPRED2	1.00698e-250	-0.649017	0.262	0.499	DOWN	cn5
SSR4	0	0.677392	0.999	0.932	UP	cn5
ST3GAL6	0	0.768729	0.961	0.822	UP	cn5
STAG1	0	-0.84621	0.969	0.994	DOWN	cn5
STS	1.40671e-279	-0.736342	0.283	0.534	DOWN	cn5
SUCO	0	-0.855464	0.737	0.889	DOWN	cn5
TEX14	1.62569e-211	-1.12834	0.655	0.76	DOWN	cn5	+17q
TMED5	0	-0.789133	0.406	0.698	DOWN	cn5	-1p
TMEM39A	1.25353e-269	-0.620388	0.622	0.762	DOWN	cn5
TNFRSF17	0	0.749314	0.884	0.459	UP	cn5
TNKS	0	-0.743964	0.624	0.772	DOWN	cn5
TOP1	0	-1.30689	0.841	0.901	DOWN	cn5
TRIM2	3.1106e-294	-0.779068	0.216	0.468	DOWN	cn5
TUBB6	0	-0.651588	0.133	0.412	DOWN	cn5
TXN	0	0.660963	0.791	0.396	UP	cn5
UBE2E2	9.34043e-212	-0.666294	0.861	0.892	DOWN	cn5
VAV3	0	-1.09101	0.285	0.641	DOWN	cn5	-1p
VMP1	0	-0.875737	0.736	0.83	DOWN	cn5	+17q
WARS	4.95208e-124	-0.608933	0.448	0.588	DOWN	cn5
XBP1	0	0.670243	0.955	0.763	UP	cn5
XPO4	4.91666e-250	-0.679606	0.456	0.636	DOWN	cn5
YME1L1	0	-0.724427	0.73	0.846	DOWN	cn5	-10p
ZBP1	0	0.788782	0.851	0.491	UP	cn5
ZBTB20	0	1.68069	0.999	0.943	UP	cn5
ZFAND3	0	-1.25385	0.934	0.975	DOWN	cn5
ZFC3H1	2.94725e-247	-0.660176	0.64	0.759	DOWN	cn5
ZFPM2-AS1	0	-1.07488	0.053	0.405	DOWN	cn5
ZNF292	0	-0.698329	0.865	0.902	DOWN	cn5
ZNF644	0	-0.828415	0.72	0.886	DOWN	cn5
ZNF804A	0	1.26025	0.96	0.553	UP	cn5
